# Supplementary material
Source: publisher figshare collection journal article supplement (https://acs.figshare.com/ndownloader/files/13677098)
Supplement: Supplementary file 1 [file 13677098]

## Sheet: NRM
Accession	Description	MW [kDa]	Biological Process	Cellular Component	Molecular Function	Pfam IDs	Entrez Gene ID	Nuclear	Manual Assign	Reference for Manual Assign
A6NHJ4	Zinc finger protein 860 [OS=Homo sapiens]	73.7	metabolic process;regulation of biological process	nucleus	DNA binding;metal ion binding	Pf00096, Pf01352, Pf13465	344787	Yes	No
O00203-1	AP-3 complex subunit beta-1 [OS=Homo sapiens]	121.2	cell organization and biogenesis;cellular component movement;coagulation;regulation of biological process;transport	Golgi;membrane	protein binding	Pf01602, Pf13646, Pf14796, Pf14797	8546	No	Yes	Science, 2017, 356, 6340. Human Protein Atlas available from www.proteinatlas.org
O43159	ribosomal rna-processing protein 8 [OS=Homo sapiens]	50.7	cell communication;cell organization and biogenesis;metabolic process;regulation of biological process;response to stimulus	cytosol;membrane;nucleus	catalytic activity;protein binding;RNA binding	Pf05148, Pf08241, Pf08242, Pf13489, Pf13847	23378	Yes	No
O75362	zinc finger protein 217 [OS=Homo sapiens]	115.2	development;metabolic process;regulation of biological process;response to stimulus	nucleus	DNA binding;metal ion binding;protein binding	Pf00096, Pf13465	7764	Yes	No
O75840-1	Krueppel-like factor 7 [OS=Homo sapiens]	33.3	cell organization and biogenesis;cellular component movement;metabolic process;regulation of biological process	nucleus	DNA binding;metal ion binding	Pf00096, Pf13465	8609	Yes	No
P00558	phosphoglycerate kinase 1 [OS=Homo sapiens]	44.6	cell differentiation;metabolic process;regulation of biological process;response to stimulus	cytoplasm;cytosol;membrane	catalytic activity;nucleotide binding;protein binding	Pf00162	5230	No	No
P05546	Heparin cofactor 2 [OS=Homo sapiens]	57	coagulation;metabolic process;regulation of biological process;response to stimulus	extracellular;organelle lumen	enzyme regulator activity	Pf00079	3053	No	No
P17040-1	Zinc finger and SCAN domain-containing protein 20 [OS=Homo sapiens]	117.5	metabolic process;regulation of biological process	nucleus	DNA binding;metal ion binding	Pf00096, Pf02023, Pf13465, Pf13837	7579	Yes	No
P24752	Acetyl-CoA acetyltransferase, mitochondrial [OS=Homo sapiens]	45.2	cell organization and biogenesis;metabolic process;response to stimulus	membrane;mitochondrion;organelle lumen	catalytic activity;metal ion binding;protein binding	Pf00108, Pf00109, Pf02803	38	No	No
P26038	Moesin [OS=Homo sapiens]	67.8	cell differentiation;cell organization and biogenesis;cell proliferation;cellular component movement;regulation of biological process;response to stimulus	cell surface;cytoplasm;cytoskeleton;cytosol;membrane;nucleus	protein binding;RNA binding;structural molecule activity	Pf00373, Pf00769, Pf09379, Pf09380	4478	Yes	No
P30041	Peroxiredoxin-6 [OS=Homo sapiens]	25	cellular homeostasis;metabolic process;regulation of biological process;response to stimulus;transport	cytoplasm;cytosol;extracellular;membrane;nucleus;organelle lumen;vacuole	antioxidant activity;catalytic activity;protein binding	Pf00578, Pf08534, Pf10417	9588	Yes	No
P35659-1	Protein DEK [OS=Homo sapiens]	42.6	cell organization and biogenesis;metabolic process;regulation of biological process;response to stimulus	nucleus	DNA binding;protein binding;RNA binding	Pf02037, Pf08766	7913	Yes	No
P36578	60S ribosomal protein L4 [OS=Homo sapiens]	47.7	cell organization and biogenesis;metabolic process;transport	cytoplasm;cytosol;endoplasmic reticulum;membrane;nucleus;ribosome	protein binding;RNA binding;structural molecule activity	Pf00573, Pf14374	6124	Yes	No
P37802-2	Isoform 2 of Transgelin-2 [OS=Homo sapiens]	24.4	cell differentiation;transport	cytosol;extracellular	protein binding	Pf00307, Pf00402	8407	No	No
P39023	60S ribosomal protein L3 [OS=Homo sapiens]	46.1	cell organization and biogenesis;metabolic process;response to stimulus;transport	cytoplasm;cytosol;nucleus;ribosome	protein binding;RNA binding;structural molecule activity	Pf00297	6122	Yes	No
P46013	Proliferation marker protein Ki-67 [OS=Homo sapiens]	358.5	cell proliferation;metabolic process;regulation of biological process;response to stimulus	chromosome;cytoplasm;membrane;nucleus	DNA binding;nucleotide binding;protein binding;RNA binding	Pf00498, Pf08065, Pf15276	4288	Yes	No
P49458	Signal recognition particle 9 kDa protein [OS=Homo sapiens]	10.1	cell organization and biogenesis;regulation of biological process;transport	cytoplasm;cytosol	protein binding;RNA binding	Pf05486	6726; 653226	No	No
P55854-2	Isoform 2 of Small ubiquitin-related modifier 3 [OS=Homo sapiens]	15.8	metabolic process;response to stimulus	chromosome;cytoplasm;nucleus	protein binding	Pf00240, Pf11976	6612	Yes	No
P60174	Triosephosphate isomerase [OS=Homo sapiens]	30.8	development;metabolic process	cytosol;nucleus	catalytic activity;protein binding	Pf00121	7167	Yes	No
P61313-1	60S ribosomal protein L15 [OS=Homo sapiens]	24.1	cell organization and biogenesis;metabolic process;response to stimulus;transport	cytosol;membrane;nucleus;ribosome	protein binding;RNA binding;structural molecule activity	Pf00827	6138	Yes	No
P61956	small ubiquitin-related modifier 2 [OS=Homo sapiens]	10.9	metabolic process;regulation of biological process;response to stimulus	nucleus	catalytic activity;protein binding;RNA binding	Pf00240, Pf11976	6613	Yes	No
P62266	40S ribosomal protein S23 [OS=Homo sapiens]	15.8	cell organization and biogenesis;metabolic process;transport	cytosol;membrane;ribosome	protein binding;RNA binding;structural molecule activity	Pf00164	6228	No	Yes	Nat. Genet., 2000, 25, 25., Nucleic Acids Res., 2017, 45, D331.
P62888	60S ribosomal protein L30 [OS=Homo sapiens]	12.8	cell organization and biogenesis;defense response;metabolic process;response to stimulus;transport	cytosol;membrane;nucleus;ribosome	protein binding;RNA binding;structural molecule activity	Pf01248	6156	Yes	No
Q02878	60S ribosomal protein L6 [OS=Homo sapiens]	32.7	cell organization and biogenesis;metabolic process;regulation of biological process;transport	cytosol;membrane;nucleus;ribosome	DNA binding;protein binding;RNA binding;structural molecule activity	Pf01159, Pf03868	6128	Yes	No
Q13887-1	Krueppel-like factor 5 [OS=Homo sapiens]	50.8	cell differentiation;cell organization and biogenesis;metabolic process;regulation of biological process;response to stimulus	Golgi;nucleus	DNA binding;metal ion binding;protein binding	Pf00096, Pf13465	688	Yes	No
Q14749	Glycine N-methyltransferase [OS=Homo sapiens]	32.7	cell organization and biogenesis;metabolic process;regulation of biological process	cytoplasm;cytosol	catalytic activity;protein binding	Pf08241, Pf08242, Pf12847, Pf13489, Pf13649, Pf13659, Pf13847	27232	No	Yes	PLoS One, 2013, 8, e70062.
Q15119-1	[Pyruvate dehydrogenase (acetyl-transferring)] kinase isozyme 2, mitochondrial [OS=Homo sapiens]	46.1	cell communication;metabolic process;regulation of biological process;response to stimulus	cytosol;mitochondrion;organelle lumen	catalytic activity;nucleotide binding;protein binding	Pf02518, Pf10436	5164	No	Yes	Science, 2017, 356, 6340. Human Protein Atlas available from www.proteinatlas.org
Q16719	kynureninase [OS=Homo sapiens]	52.3	metabolic process;response to stimulus	cytoplasm;cytosol;mitochondrion	catalytic activity;protein binding	Pf00266	8942	No	Yes	Science, 2017, 356, 6340. Human Protein Atlas available from www.proteinatlas.org
Q16881-1	Thioredoxin reductase 1, cytoplasmic [OS=Homo sapiens]	70.9	cell proliferation;cellular homeostasis;metabolic process;regulation of biological process;response to stimulus;transport	cytoplasm;cytosol;mitochondrion;nucleus	antioxidant activity;catalytic activity;nucleotide binding;protein binding	Pf00070, Pf00462, Pf02852, Pf07992, Pf13738	7296	Yes	No
Q17RN3-1	Protein Fam98c [OS=Homo sapiens]	37.3				Pf10239	147965	No	Yes	Science, 2017, 356, 6340. Human Protein Atlas available from www.proteinatlas.org
Q6PG37	Zinc finger protein 790 [OS=Homo sapiens]	74.5	metabolic process;regulation of biological process	nucleus;ribosome	DNA binding;metal ion binding;structural molecule activity	Pf01352, Pf01780, Pf13465	388536	Yes	No
Q6ZN08	Putative zinc finger protein 66 [OS=Homo sapiens]	65.8	metabolic process;regulation of biological process	nucleus	DNA binding;metal ion binding	Pf01352, Pf13465	7617	Yes	No
Q7Z5J4	Retinoic acid-induced protein 1 [OS=Homo sapiens]	203.2	regulation of biological process	cytoplasm;mitochondrion;nucleus	DNA binding;metal ion binding;protein binding	Pf13771, Pf13832	10743	Yes	No
Q86SJ2	Amphoterin-induced protein 2 [OS=Homo sapiens]	57.9	regulation of biological process	membrane;nucleus	protein binding	Pf00047, Pf07679, Pf12799, Pf13855, Pf13927	347902	Yes	No
Q86UV5-8	Isoform 8 of Ubiquitin carboxyl-terminal hydrolase 48 [OS=Homo sapiens]	120.4	metabolic process	cytosol;mitochondrion	catalytic activity;protein binding	Pf00240, Pf00443, Pf06337, Pf13423	84196	No	Yes	Cell. Signal. 18:83-92(2006)
Q86VQ6	Thioredoxin reductase 3 [OS=Homo sapiens]	70.6	cell differentiation;cellular homeostasis;development;metabolic process;regulation of biological process;response to stimulus;transport	cytoplasm;endoplasmic reticulum;mitochondrion;nucleus	antioxidant activity;catalytic activity;nucleotide binding	Pf00070, Pf00462, Pf02852, Pf07992, Pf13738	114112	Yes	No
Q8IW75	Serpin A12 [OS=Homo sapiens]	47.1	regulation of biological process	extracellular;membrane	enzyme regulator activity	Pf00079	145264	No	No
Q8N972	Zinc finger protein 709 [OS=Homo sapiens]	74.6	metabolic process;regulation of biological process	nucleus	DNA binding;metal ion binding	Pf01352, Pf13465	163051	Yes	No
Q8NHY6	Zinc finger protein 28 homolog [OS=Homo sapiens]	98.6	metabolic process;regulation of biological process	nucleus	DNA binding;metal ion binding	Pf00096, Pf01352, Pf13465	140612	Yes	No
Q92743	Serine protease HTRA1 [OS=Homo sapiens]	51.3	cell differentiation;cell organization and biogenesis;metabolic process;regulation of biological process	cytoplasm;cytosol;extracellular;membrane	catalytic activity;protein binding	Pf00050, Pf00089, Pf00219, Pf00595, Pf05579, Pf07648, Pf10459, Pf13180, Pf13365	5654	No	No
Q96FN9	Probable D-tyrosyl-tRNA(Tyr) deacylase 2 [OS=Homo sapiens]	18.6	metabolic process;regulation of biological process	cytoplasm	catalytic activity;protein binding	Pf02580	112487	No	No
Q96GN5-1	cell division cycle-associated 7-like protein [OS=Homo sapiens]	52.2	cell division;metabolic process;regulation of biological process	cytoplasm;cytosol;nucleus	protein binding	Pf10497	55536	Yes	No
Q96JN2-4	Isoform 4 of Coiled-coil domain-containing protein 136 [OS=Homo sapiens]	134.6	cell organization and biogenesis	membrane			64753	No	Yes	Science, 2017, 356, 6340. Human Protein Atlas available from www.proteinatlas.org
Q96KM6	zinc finger protein 512B [OS=Homo sapiens]	97.2	metabolic process;regulation of biological process	nucleus	DNA binding;metal ion binding;protein binding		57473	Yes	No
Q96ME7	Zinc finger protein 512 [OS=Homo sapiens]	64.6	metabolic process;regulation of biological process	nucleus	DNA binding;metal ion binding		84450	Yes	No
Q96T88-2	Isoform 2 of E3 ubiquitin-protein ligase UHRF1 [OS=Homo sapiens]	91.1	cell organization and biogenesis;cell proliferation;metabolic process;regulation of biological process;response to stimulus	nucleus	catalytic activity;DNA binding;metal ion binding;nucleotide binding;protein binding	Pf00097, Pf00240, Pf00628, Pf02182, Pf11976, Pf12148, Pf13639, Pf13923, Pf14634	29128	Yes	No
Q99714-1	3-hydroxyacyl-CoA dehydrogenase type-2 [OS=Homo sapiens]	26.9	cell organization and biogenesis;metabolic process	cytoplasm;membrane;mitochondrion;organelle lumen	catalytic activity;protein binding;RNA binding	Pf00106, Pf08659, Pf13561	3028	No	No
Q9BTE0	N-acetyltransferase 9 [OS=Homo sapiens]	23.3			catalytic activity;protein binding	Pf00583, Pf08445, Pf13302, Pf13420	26151	No	Yes	Science, 2017, 356, 6340. Human Protein Atlas available from www.proteinatlas.org
Q9BUF5	Tubulin beta-6 chain [OS=Homo sapiens]	49.8	cell organization and biogenesis	cytoplasm;cytoskeleton;nucleus	catalytic activity;nucleotide binding;structural molecule activity	Pf00091, Pf03953, Pf10644	84617	Yes	No
Q9BXR6	Complement factor H-related protein 5 [OS=Homo sapiens]	64.4	defense response;metabolic process;regulation of biological process;response to stimulus	extracellular	protein binding	Pf00084	81494	No	No
Q9BZ29-4	Isoform 4 of Dedicator of cytokinesis protein 9 [OS=Homo sapiens]	238.7	coagulation;regulation of biological process;response to stimulus	cytosol;membrane	protein binding	Pf00169, Pf06920, Pf11878, Pf14429	23348	No	No
Q9NQX6	Zinc finger protein 331 [OS=Homo sapiens]	53.7	metabolic process;regulation of biological process	nucleus	DNA binding;metal ion binding	Pf01352, Pf09723, Pf13465	55422	Yes	No
Q9UIG0	Tyrosine-protein kinase BAZ1B [OS=Homo sapiens]	170.8	cell organization and biogenesis;metabolic process;regulation of biological process;response to stimulus	chromosome;nucleus	catalytic activity;metal ion binding;nucleotide binding;protein binding	Pf00439, Pf00628, Pf10537, Pf15613, Pf15614	9031	Yes	No
Q9ULI1	NACHT and WD repeat domain-containing protein 2 [OS=Homo sapiens]	197.3			protein binding	Pf05729, Pf13191	57495	No	No
Q9Y625	Glypican-6 [OS=Homo sapiens]	62.7	cellular component movement;metabolic process;regulation of biological process;response to stimulus	extracellular;membrane;nucleus;organelle lumen	protein binding	Pf01153	10082	Yes	No
Q9Y6I9	Testis-expressed protein 264 [OS=Homo sapiens]	34.2	transport	extracellular;organelle lumen	protein binding	Pf06445	51368	No	Yes	Science, 2017, 356, 6340. Human Protein Atlas available from www.proteinatlas.org

## Sheet: MRM
Accession	Description	MW [kDa]	Biological Process	Cellular Component	Molecular Function	Pfam IDs	Entrez Gene ID	Mitochondria	Manual Assign	Reference for Manual Assign
A8MXV4	nucleoside diphosphate-linked moiety X motif 19 [OS=Homo sapiens]	42.2	metabolic process	mitochondrion;organelle lumen	catalytic activity;metal ion binding;protein binding		390916	Yes	No
O00217	NADH dehydrogenase [ubiquinone] iron-sulfur protein 8, mitochondrial [OS=Homo sapiens]	23.7	cell organization and biogenesis;metabolic process;response to stimulus;transport	membrane;mitochondrion;organelle lumen	catalytic activity;metal ion binding	Pf00037, Pf12837, Pf12838, Pf13183, Pf13187, Pf13237, Pf13459, Pf13484, Pf13534, Pf14697	4728	Yes	No
O00410-3	Isoform 3 of Importin-5 [OS=Homo sapiens]	125.5	regulation of biological process;response to stimulus;transport	cytoplasm;membrane;nucleus	enzyme regulator activity;protein binding;RNA binding;transporter activity	Pf02985, Pf12755, Pf13513, Pf13646	3843	No	No
O00411	DNA-directed RNA polymerase, mitochondrial [OS=Homo sapiens]	138.5	cell organization and biogenesis;metabolic process	mitochondrion;organelle lumen	catalytic activity;DNA binding;protein binding;RNA binding	Pf00940, Pf14700	5442	Yes	No
O15091	Mitochondrial ribonuclease P protein 3 [OS=Homo sapiens]	67.3	metabolic process	mitochondrion;nucleus;organelle lumen	catalytic activity;protein binding		9692	Yes	No
O43169	Cytochrome b5 type B [OS=Homo sapiens]	16.3	metabolic process;transport	membrane;mitochondrion	metal ion binding;protein binding	Pf00173	80777	Yes	No
O43175	D-3-phosphoglycerate dehydrogenase [OS=Homo sapiens]	56.6	metabolic process	cytosol	catalytic activity;nucleotide binding	Pf00389, Pf02826	26227	No	No
O43766-1	Lipoyl synthase, mitochondrial [OS=Homo sapiens]	41.9	defense response;metabolic process;response to stimulus	mitochondrion;organelle lumen	catalytic activity;metal ion binding	Pf04055	11019	Yes	No
O43772	mitochondrial carnitine/acylcarnitine carrier protein [OS=Homo sapiens]	32.9	transport	cytosol;membrane;mitochondrion	transporter activity	Pf00153	788	Yes	No
O60506	Heterogeneous nuclear ribonucleoprotein Q [OS=Homo sapiens]	69.6	cell differentiation;metabolic process;regulation of biological process;response to stimulus	cytoplasm;endoplasmic reticulum;membrane;nucleus;spliceosomal complex	protein binding;RNA binding	Pf00076, Pf13893, Pf14259	10492	No	No
O60783	28S ribosomal protein S14, mitochondrial [OS=Homo sapiens]	15.1	cell organization and biogenesis;metabolic process	membrane;mitochondrion;ribosome	RNA binding;structural molecule activity	Pf00253	63931	Yes	No
O75027-2	Isoform 2 of ATP-binding cassette sub-family B member 7, mitochondrial [OS=Homo sapiens]	82.7	cellular homeostasis;transport	membrane;mitochondrion	catalytic activity;nucleotide binding;transporter activity	Pf00005, Pf00664, Pf13207, Pf13304	22	Yes	No
O75251	NADH dehydrogenase [ubiquinone] iron-sulfur protein 7, mitochondrial [OS=Homo sapiens]	23.5	cell organization and biogenesis;metabolic process;transport	membrane;mitochondrion;organelle lumen	catalytic activity;metal ion binding;protein binding	Pf01058	374291	Yes	No
O75306-1	NADH dehydrogenase [ubiquinone] iron-sulfur protein 2, mitochondrial [OS=Homo sapiens]	52.5	cell organization and biogenesis;metabolic process;response to stimulus;transport	membrane;mitochondrion;organelle lumen	catalytic activity;metal ion binding;nucleotide binding;protein binding	Pf00346	4720	Yes	No
O75346-1	Zinc finger protein 253 [OS=Homo sapiens]	57.6	metabolic process;regulation of biological process	nucleus	DNA binding;metal ion binding	Pf01352, Pf13465	56242	No	No
O75380	NADH dehydrogenase [ubiquinone] iron-sulfur protein 6, mitochondrial [OS=Homo sapiens]	13.7	cell organization and biogenesis;metabolic process;transport	membrane;mitochondrion	catalytic activity	Pf10276	4726	Yes	No
O75390	citrate synthase, mitochondrial [OS=Homo sapiens]	51.7	metabolic process	mitochondrion;nucleus;organelle lumen	catalytic activity;RNA binding	Pf00285	1431	Yes	No
O75439	mitochondrial-processing peptidase subunit beta [OS=Homo sapiens]	54.3	metabolic process;transport	membrane;mitochondrion;organelle lumen	catalytic activity;metal ion binding	Pf00675, Pf05193	9512	Yes	No
O75489	NADH dehydrogenase [ubiquinone] iron-sulfur protein 3, mitochondrial [OS=Homo sapiens]	30.2	cell organization and biogenesis;metabolic process;regulation of biological process;transport	membrane;mitochondrion;organelle lumen	catalytic activity;protein binding	Pf00329	4722	Yes	No
O75608	Acyl-protein thioesterase 1 [OS=Homo sapiens]	24.7	metabolic process;regulation of biological process	cytoplasm;cytosol;mitochondrion	catalytic activity;protein binding	Pf00561, Pf02230, Pf03959, Pf07859, Pf12695, Pf12697	10434	Yes	No
O75616-1	GTPase Era, mitochondrial [OS=Homo sapiens]	48.3	cell organization and biogenesis;metabolic process;regulation of biological process;response to stimulus	cytosol;membrane;mitochondrion;organelle lumen	catalytic activity;nucleotide binding;protein binding;RNA binding	Pf00350, Pf01926, Pf02421, Pf03193, Pf04548, Pf08477, Pf13521	26284	Yes	No
O95299	NADH dehydrogenase [ubiquinone] 1 alpha subcomplex subunit 10, mitochondrial [OS=Homo sapiens]	40.7	cell organization and biogenesis;metabolic process;transport	membrane;mitochondrion;organelle lumen	catalytic activity	Pf01712, Pf13207	4705	Yes	No
O95299-2	Isoform 2 of NADH dehydrogenase [ubiquinone] 1 alpha subcomplex subunit 10, mitochondrial [OS=Homo sapiens]	48.5	cell organization and biogenesis;metabolic process	membrane;mitochondrion;organelle lumen	catalytic activity	Pf13207	4705	Yes	No
O95363	phenylalanine--tRNA ligase, mitochondrial [OS=Homo sapiens]	52.3	metabolic process	cytoplasm;mitochondrion;organelle lumen	catalytic activity;metal ion binding;nucleotide binding;protein binding;RNA binding	Pf01409, Pf03147	10667	Yes	No
P00367	Glutamate dehydrogenase 1, mitochondrial [OS=Homo sapiens]	61.4	cell organization and biogenesis;metabolic process;regulation of biological process	cytoplasm;mitochondrion;organelle lumen	catalytic activity;nucleotide binding;protein binding	Pf00208, Pf02812	2746	Yes	No
P00403	Cytochrome c oxidase subunit 2 [OS=Homo sapiens]	25.5	metabolic process;response to stimulus;transport	membrane;mitochondrion	catalytic activity;metal ion binding;protein binding;transporter activity	Pf00116, Pf02790	4513	Yes	No
P02786	Transferrin receptor protein 1 [OS=Homo sapiens]	84.8	cell differentiation;cell organization and biogenesis;cellular homeostasis;metabolic process;regulation of biological process;response to stimulus;transport	cell surface;endosome;extracellular;membrane	protein binding;receptor activity;RNA binding;transporter activity	Pf02225, Pf04253, Pf04389	7037	No	No
P02794	Ferritin heavy chain [OS=Homo sapiens]	21.2	cellular homeostasis;metabolic process;regulation of biological process;response to stimulus;transport	cytosol;extracellular;nucleus;vacuole	catalytic activity;metal ion binding;protein binding	Pf00210	2495	No	Yes	Nucleic Acids Res., 2016, 44, D1251.
P04075-2	Isoform 2 of Fructose-bisphosphate aldolase A [OS=Homo sapiens]	45.2	cell organization and biogenesis;cellular homeostasis;metabolic process;regulation of biological process;transport	cytoskeleton;cytosol;extracellular;membrane;nucleus;organelle lumen	catalytic activity;protein binding;RNA binding	Pf00274	226	No	No
P04181-1	Ornithine aminotransferase, mitochondrial [OS=Homo sapiens]	48.5	cell organization and biogenesis;metabolic process	cytoplasm;mitochondrion;organelle lumen	catalytic activity;protein binding	Pf00202	4942	Yes	No
P05141	ADP/ATP translocase 2 [OS=Homo sapiens]	32.8	regulation of biological process;transport	membrane;mitochondrion;nucleus	protein binding;RNA binding;transporter activity	Pf00153	292	Yes	No
P06748	Nucleophosmin [OS=Homo sapiens]	32.6	cell growth;cell organization and biogenesis;cellular homeostasis;metabolic process;regulation of biological process;response to stimulus;transport	cytoplasm;cytoskeleton;cytosol;membrane;nucleus	DNA binding;enzyme regulator activity;protein binding;RNA binding	Pf03066	4869	No	Yes	Biochim. Biophys. Acta, 2011, 1813, 584.
P06753	Tropomyosin alpha-3 chain [OS=Homo sapiens]	32.9	cell organization and biogenesis;cellular component movement	cytoplasm;cytoskeleton;cytosol	protein binding;structural molecule activity	Pf00261, Pf12718	7170	No	No
P07237	Protein disulfide-isomerase [OS=Homo sapiens]	57.1	cell organization and biogenesis;cellular homeostasis;metabolic process;regulation of biological process;response to stimulus	endoplasmic reticulum;extracellular;membrane;organelle lumen	catalytic activity;metal ion binding;protein binding;RNA binding	Pf00085, Pf01216, Pf13098, Pf13848, Pf13899, Pf13905	5034	No	Yes	Nucleic Acids Res., 2016, 44, D1251.
P07355-2	Isoform 2 of Annexin A2 [OS=Homo sapiens]	40.4	cell organization and biogenesis;metabolic process;regulation of biological process;response to stimulus;transport	cell surface;cytoplasm;cytosol;endosome;extracellular;membrane;nucleus;organelle lumen	enzyme regulator activity;metal ion binding;protein binding;RNA binding	Pf00191	302	No	No
P07437	tubulin beta chain [OS=Homo sapiens]	49.6	cell division;cell organization and biogenesis;cellular component movement;defense response;regulation of biological process;response to stimulus;transport	cytoplasm;cytoskeleton;extracellular;membrane;nucleus;organelle lumen	catalytic activity;nucleotide binding;protein binding;structural molecule activity	Pf00091, Pf03953, Pf10644	203068	No	No
P07711	Cathepsin L1 [OS=Homo sapiens]	37.5	cell death;cell organization and biogenesis;metabolic process;regulation of biological process;response to stimulus	extracellular;nucleus;organelle lumen;vacuole	catalytic activity;protein binding	Pf00112, Pf08246	1514	No	No
P07900-2	Isoform 2 of Heat shock protein HSP 90-alpha [OS=Homo sapiens]	98.1	cell organization and biogenesis;metabolic process;regulation of biological process;response to stimulus;transport	cytoplasm;cytosol;extracellular;membrane;nucleus;organelle lumen	catalytic activity;enzyme regulator activity;nucleotide binding;protein binding;RNA binding	Pf00183, Pf02518, Pf13589	3320	No	No
P08195-4	Isoform 4 of 4F2 cell-surface antigen heavy chain [OS=Homo sapiens]	71.1	cell growth;cellular component movement;metabolic process;response to stimulus;transport	cell surface;cytosol;membrane;nucleus	catalytic activity;protein binding;RNA binding;transporter activity	Pf00128	6520	No	No
P08238	Heat shock protein HSP 90-beta [OS=Homo sapiens]	83.2	cell organization and biogenesis;metabolic process;regulation of biological process;response to stimulus;transport	cell surface;cytoplasm;cytosol;extracellular;membrane;mitochondrion;nucleus;organelle lumen	enzyme regulator activity;nucleotide binding;protein binding;RNA binding	Pf00183, Pf02518, Pf13589	3326	Yes	No
P08559-2	Isoform 2 of Pyruvate dehydrogenase E1 component subunit alpha, somatic form, mitochondrial [OS=Homo sapiens]	44.1	metabolic process;regulation of biological process	mitochondrion;nucleus;organelle lumen	catalytic activity;protein binding	Pf00676	5160	Yes	No
P08559-4	Isoform 4 of Pyruvate dehydrogenase E1 component subunit alpha, somatic form, mitochondrial [OS=Homo sapiens]	47.5	metabolic process;regulation of biological process	mitochondrion;nucleus;organelle lumen	catalytic activity;protein binding	Pf00676	5160	Yes	No
P08670	Vimentin [OS=Homo sapiens]	53.6	cell differentiation;cell organization and biogenesis;cellular component movement;metabolic process;regulation of biological process;response to stimulus	cytoplasm;cytoskeleton;cytosol;membrane	protein binding;RNA binding;structural molecule activity	Pf00038, Pf04111, Pf04156, Pf04732, Pf05622, Pf10186	7431	No	Yes	FASEB J. 2015, 29, 820.
P09001	39S ribosomal protein L3, mitochondrial [OS=Homo sapiens]	38.6	cell organization and biogenesis;metabolic process	membrane;mitochondrion;ribosome	catalytic activity;RNA binding;structural molecule activity	Pf00297	11222	Yes	No
P09622	Dihydrolipoyl dehydrogenase, mitochondrial [OS=Homo sapiens]	54.1	cellular homeostasis;metabolic process;regulation of biological process	mitochondrion;organelle lumen	catalytic activity;nucleotide binding;protein binding	Pf00070, Pf00890, Pf01134, Pf02852, Pf03486, Pf07992, Pf12831, Pf13450	1738	Yes	No
P0C7P4	Putative cytochrome b-c1 complex subunit Rieske-like protein 1 [OS=Homo sapiens]	30.8	metabolic process;transport	membrane	catalytic activity;metal ion binding;transporter activity	Pf00355, Pf02921, Pf09165	100128525	No	No
P10515	Dihydrolipoyllysine-residue acetyltransferase component of pyruvate dehydrogenase complex, mitochondrial [OS=Homo sapiens]	69	metabolic process;regulation of biological process	mitochondrion;organelle lumen	catalytic activity;protein binding	Pf00198, Pf00364, Pf02817	1737	Yes	No
P10809	60 kDa heat shock protein, mitochondrial [OS=Homo sapiens]	61	cell organization and biogenesis;cell proliferation;metabolic process;regulation of biological process;response to stimulus;transport	cell surface;cytoplasm;cytosol;endosome;membrane;mitochondrion;organelle lumen	catalytic activity;DNA binding;nucleotide binding;protein binding;RNA binding	Pf00118	3329	Yes	No
P11142-1	Heat shock cognate 71 kDa protein [OS=Homo sapiens]	70.9	cell communication;cell organization and biogenesis;metabolic process;regulation of biological process;response to stimulus;transport	cytoplasm;cytosol;endosome;extracellular;membrane;nucleus;organelle lumen;spliceosomal complex	catalytic activity;nucleotide binding;protein binding;RNA binding	Pf00012, Pf02463, Pf06723	3312	No	No
P11166	Solute carrier family 2, facilitated glucose transporter member 1 [OS=Homo sapiens]	54	cell communication;cell organization and biogenesis;metabolic process;regulation of biological process;response to stimulus;transport	cytoplasm;cytoskeleton;cytosol;membrane;nucleus	protein binding;transporter activity	Pf00083, Pf07690, Pf13347	6513	No	No
P11177	Pyruvate dehydrogenase E1 component subunit beta, mitochondrial [OS=Homo sapiens]	39.2	metabolic process;regulation of biological process	mitochondrion;nucleus;organelle lumen	catalytic activity;protein binding	Pf02779, Pf02780	5162	Yes	No
P11310-2	Isoform 2 of Medium-chain specific acyl-CoA dehydrogenase, mitochondrial [OS=Homo sapiens]	47	metabolic process;regulation of biological process	membrane;mitochondrion;nucleus;organelle lumen	catalytic activity;nucleotide binding;protein binding	Pf00441, Pf02770, Pf02771, Pf08028, Pf11794	34	Yes	No
P11498	pyruvate carboxylase, mitochondrial [OS=Homo sapiens]	129.6	metabolic process;regulation of biological process	cytoplasm;cytosol;mitochondrion;organelle lumen	catalytic activity;metal ion binding;nucleotide binding;protein binding	Pf00289, Pf00364, Pf00682, Pf02222, Pf02436, Pf02785, Pf02786, Pf07478, Pf08443, Pf13533, Pf13535, Pf15632	5091	Yes	No
P12694-2	Isoform 2 of 2-oxoisovalerate dehydrogenase subunit alpha, mitochondrial [OS=Homo sapiens]	50.8	metabolic process	mitochondrion;organelle lumen	catalytic activity;metal ion binding;protein binding	Pf00456, Pf00676	593	Yes	No
P13995	Bifunctional methylenetetrahydrofolate dehydrogenase/cyclohydrolase, mitochondrial [OS=Homo sapiens]	37.9	metabolic process	cytosol;mitochondrion;organelle lumen	catalytic activity;metal ion binding	Pf00763, Pf02882	10797	Yes	No
P14174	Macrophage Migration inhibitory factor [OS=Homo sapiens]	12.5	cell organization and biogenesis;cell proliferation;cellular component movement;defense response;metabolic process;regulation of biological process;response to stimulus;transport	cell surface;cytoplasm;cytosol;extracellular;organelle lumen	catalytic activity;protein binding	Pf01187	4282	No	No
P14618	Pyruvate kinase PKM [OS=Homo sapiens]	57.9	cell death;cell organization and biogenesis;metabolic process;response to stimulus;transport	cytoplasm;cytosol;extracellular;mitochondrion;nucleus;organelle lumen	catalytic activity;metal ion binding;nucleotide binding;protein binding;RNA binding	Pf00224, Pf02887	5315	Yes	No
P15121	aldose reductase [OS=Homo sapiens]	35.8	metabolic process;regulation of biological process;response to stimulus	cytoplasm;cytosol;extracellular;vacuole	catalytic activity;protein binding	Pf00248	231	No	Yes	FEBS Letters, 2003, 534, 175
P16615	Sarcoplasmic/endoplasmic reticulum calcium ATPase 2 [OS=Homo sapiens]	114.7	cell organization and biogenesis;cellular homeostasis;regulation of biological process;response to stimulus;transport	endoplasmic reticulum;membrane	catalytic activity;metal ion binding;nucleotide binding;protein binding;transporter activity	Pf00122, Pf00689, Pf00690, Pf00702, Pf08282, Pf12710, Pf13246	488	No	No
P21333	Filamin-A [OS=Homo sapiens]	280.6	cell organization and biogenesis;cellular component movement;metabolic process;regulation of biological process;response to stimulus;transport	cytoplasm;cytoskeleton;cytosol;extracellular;membrane;nucleus	protein binding;RNA binding;signal transducer activity	Pf00307, Pf00630	2316	No	No
P21912	Succinate dehydrogenase [ubiquinone] iron-sulfur subunit, mitochondrial [OS=Homo sapiens]	31.6	metabolic process;transport	membrane;mitochondrion	catalytic activity;metal ion binding;protein binding	Pf13085, Pf13183, Pf13534	6390	Yes	No
P22105-4	Isoform 5 of Tenascin-X [OS=Homo sapiens]	458.2	cell organization and biogenesis;metabolic process;regulation of biological process;response to stimulus	extracellular;membrane	catalytic activity;nucleotide binding;protein binding;receptor activity;signal transducer activity	Pf00041, Pf00147, Pf00757, Pf01500, Pf04885, Pf07974	7148	No	No
P22695	Cytochrome b-c1 complex subunit 2, mitochondrial [OS=Homo sapiens]	48.4	metabolic process;transport	membrane;mitochondrion	catalytic activity;metal ion binding;protein binding	Pf00675, Pf05193	7385	Yes	No
P24752	Acetyl-CoA acetyltransferase, mitochondrial [OS=Homo sapiens]	45.2	cell organization and biogenesis;metabolic process;response to stimulus	membrane;mitochondrion;organelle lumen	catalytic activity;metal ion binding;protein binding	Pf00108, Pf00109, Pf02803	38	Yes	No
P25325-2	Isoform 2 of 3-mercaptopyruvate sulfurtransferase [OS=Homo sapiens]	35.2	metabolic process;response to stimulus	cytosol;mitochondrion	catalytic activity;protein binding	Pf00581	4357	Yes	No
P25705-1	ATP synthase subunit alpha, mitochondrial [OS=Homo sapiens]	59.7	cell organization and biogenesis;metabolic process;regulation of biological process;transport	membrane;mitochondrion;organelle lumen	catalytic activity;nucleotide binding;protein binding;RNA binding;transporter activity	Pf00006, Pf00306, Pf02663, Pf02874, Pf05943	498	Yes	No
P26447	Protein S100-A4 [OS=Homo sapiens]	11.7	cell organization and biogenesis;regulation of biological process	extracellular;nucleus	metal ion binding;protein binding;RNA binding	Pf01023, Pf13499	6275	No	No
P26641-2	Isoform 2 of Elongation factor 1-gamma [OS=Homo sapiens]	56.1	metabolic process;response to stimulus	cytoplasm;cytosol;endoplasmic reticulum;membrane;nucleus	catalytic activity;protein binding;RNA binding	Pf00043, Pf00647, Pf02798, Pf13409, Pf13410, Pf13417, Pf14497	1937	No	Yes	Science, 2017, 356, 6340. Human Protein Atlas available from www.proteinatlas.org
P27694	Replication protein A 70 kDa DNA-binding subunit [OS=Homo sapiens]	68.1	cell organization and biogenesis;cellular homeostasis;metabolic process;regulation of biological process;response to stimulus	nucleus	DNA binding;metal ion binding;protein binding	Pf01336, Pf01485, Pf04057, Pf08646	6117	No	No
P27708	CAD protein [OS=Homo sapiens]	242.8	metabolic process	cytoplasm;cytosol;membrane;nucleus	catalytic activity;metal ion binding;nucleotide binding;protein binding	Pf00117, Pf00185, Pf00289, Pf00988, Pf01979, Pf02142, Pf02222, Pf02729, Pf02786, Pf02787, Pf07478, Pf07722, Pf13147, Pf13535, Pf13594, Pf15632	790	No	No
P28331-2	Isoform 2 of NADH-ubiquinone oxidoreductase 75 kDa subunit, mitochondrial [OS=Homo sapiens]	80.9	cell organization and biogenesis;metabolic process	mitochondrion;organelle lumen	catalytic activity;metal ion binding;protein binding	Pf00111, Pf00384, Pf09326, Pf10588, Pf13510	4719	Yes	No
P30041	Peroxiredoxin-6 [OS=Homo sapiens]	25	cellular homeostasis;metabolic process;regulation of biological process;response to stimulus;transport	cytoplasm;cytosol;extracellular;membrane;nucleus;organelle lumen;vacuole	antioxidant activity;catalytic activity;protein binding	Pf00578, Pf08534, Pf10417	9588	No	Yes	Nucleic Acids Res., 2016, 44, D1251.
P30042-1	ES1 protein homolog, mitochondrial [OS=Homo sapiens]	28.2		mitochondrion		Pf01965	8209; 102724023	Yes	No
P30048	Thioredoxin-dependent peroxide reductase, mitochondrial [OS=Homo sapiens]	27.7	cell death;cell differentiation;cell organization and biogenesis;cellular homeostasis;metabolic process;regulation of biological process;response to stimulus	cytoplasm;cytosol;endosome;mitochondrion;organelle lumen	antioxidant activity;catalytic activity;enzyme regulator activity;protein binding	Pf00578, Pf08534, Pf10417, Pf13905	10935	Yes	No
P30084	Enoyl-CoA hydratase, mitochondrial [OS=Homo sapiens]	31.4	metabolic process	mitochondrion;organelle lumen	catalytic activity;protein binding	Pf00378, Pf01343	1892	Yes	No
P30101	Protein disulfide-isomerase A3 [OS=Homo sapiens]	56.7	cellular homeostasis;metabolic process;regulation of biological process;response to stimulus;transport	cell surface;endoplasmic reticulum;membrane;nucleus;organelle lumen	catalytic activity;protein binding;RNA binding	Pf00085, Pf13098, Pf13848, Pf13899, Pf13905	2923	No	No
P30405	Peptidyl-prolyl cis-trans isomerase F, mitochondrial [OS=Homo sapiens]	22	cell death;cell organization and biogenesis;metabolic process;regulation of biological process;response to stimulus	membrane;mitochondrion;organelle lumen	catalytic activity;protein binding	Pf00160	10105	Yes	No
P30837	Aldehyde dehydrogenase X, mitochondrial [OS=Homo sapiens]	57.2	metabolic process	mitochondrion;organelle lumen	catalytic activity;nucleotide binding	Pf00171	219	Yes	No
P31040	Succinate dehydrogenase [ubiquinone] flavoprotein subunit, mitochondrial [OS=Homo sapiens]	72.6	metabolic process;transport	membrane;mitochondrion	catalytic activity;nucleotide binding;protein binding	Pf00890, Pf02910	6389	Yes	No
P31327-3	Isoform 3 of Carbamoyl-phosphate synthase [ammonia], mitochondrial [OS=Homo sapiens]	165.5	cell differentiation;metabolic process;response to stimulus	membrane;organelle lumen	catalytic activity;metal ion binding;nucleotide binding;protein binding	Pf00117, Pf00289, Pf00988, Pf02142, Pf02222, Pf02786, Pf02787, Pf07478, Pf13535, Pf15632	1373	No	Yes	Nucleic Acids Res., 2017, 45, D158
P31930	Cytochrome b-c1 complex subunit 1, mitochondrial [OS=Homo sapiens]	52.6	metabolic process;response to stimulus;transport	cytosol;membrane;mitochondrion	catalytic activity;metal ion binding;protein binding;transporter activity	Pf00675, Pf05193, Pf08367	7384	Yes	No
P31943	Heterogeneous nuclear ribonucleoprotein H [OS=Homo sapiens]	49.2	metabolic process;regulation of biological process;response to stimulus	cytosol;membrane;nucleus;spliceosomal complex	protein binding;RNA binding	Pf00076, Pf08080, Pf14259	3187	No	No
P34897-1	Serine hydroxymethyltransferase, mitochondrial [OS=Homo sapiens]	56	cell organization and biogenesis;metabolic process;regulation of biological process;response to stimulus	cytoplasm;cytoskeleton;membrane;mitochondrion;nucleus;organelle lumen	catalytic activity;protein binding	Pf00464	6472	Yes	No
P35914	Hydroxymethylglutaryl-CoA lyase, mitochondrial [OS=Homo sapiens]	34.3	cell organization and biogenesis;metabolic process;response to stimulus	membrane;mitochondrion;organelle lumen	catalytic activity;metal ion binding;protein binding	Pf00682	3155	Yes	No
P36542-1	ATP synthase subunit gamma, mitochondrial [OS=Homo sapiens]	33	cell organization and biogenesis;metabolic process;transport	membrane;mitochondrion;organelle lumen	catalytic activity;RNA binding;transporter activity	Pf00231	509	Yes	No
P36957	Dihydrolipoyllysine-residue succinyltransferase component of 2-oxoglutarate dehydrogenase complex, mitochondrial [OS=Homo sapiens]	48.7	metabolic process	membrane;mitochondrion;nucleus;organelle lumen	catalytic activity	Pf00198, Pf00364	1743	Yes	No
P38646	Stress-70 protein, mitochondrial [OS=Homo sapiens]	73.6	cell differentiation;cell organization and biogenesis;metabolic process;regulation of biological process;response to stimulus	cytoplasm;mitochondrion;nucleus;organelle lumen	nucleotide binding;protein binding;RNA binding	Pf00012, Pf06723	3313	Yes	No
P39023	60S ribosomal protein L3 [OS=Homo sapiens]	46.1	cell organization and biogenesis;metabolic process;response to stimulus;transport	cytoplasm;cytosol;nucleus;ribosome	protein binding;RNA binding;structural molecule activity	Pf00297	6122	No	No
P40939	Trifunctional enzyme subunit alpha, mitochondrial [OS=Homo sapiens]	82.9	metabolic process;response to stimulus	membrane;mitochondrion	catalytic activity;nucleotide binding;protein binding	Pf00378, Pf00725, Pf02737	3030	Yes	No
P41250	Glycine--tRNA ligase [OS=Homo sapiens]	83.1	metabolic process	cytoplasm;cytosol;extracellular;mitochondrion;organelle lumen	catalytic activity;nucleotide binding;protein binding	Pf00458, Pf00587, Pf03129	2617	Yes	No
P42677	40S ribosomal protein S27 [OS=Homo sapiens]	9.5	cell organization and biogenesis;cell proliferation;metabolic process;transport	cytosol;nucleus;ribosome	DNA binding;metal ion binding;protein binding;RNA binding;structural molecule activity	Pf01667	6232	No	No
P42704	Leucine-rich PPR motif-containing protein, mitochondrial [OS=Homo sapiens]	157.8	cellular component movement;metabolic process;regulation of biological process;transport	chromosome;cytoplasm;cytoskeleton;membrane;mitochondrion;nucleus	catalytic activity;DNA binding;protein binding;RNA binding	Pf12854, Pf13041, Pf13812	10128	Yes	No
P42765	3-ketoacyl-CoA thiolase, mitochondrial [OS=Homo sapiens]	41.9	cell organization and biogenesis;metabolic process;regulation of biological process;response to stimulus	membrane;mitochondrion;organelle lumen	catalytic activity;protein binding;RNA binding	Pf00108, Pf02801, Pf02803	10449	Yes	No
P45880-1	Isoform 1 of Voltage-dependent anion-selective channel protein 2 [OS=Homo sapiens]	33.4	regulation of biological process;transport	membrane;mitochondrion;nucleus	nucleotide binding;protein binding;transporter activity	Pf01459	7417	Yes	No
P46199	Translation initiation factor IF-2, mitochondrial [OS=Homo sapiens]	81.3	cell organization and biogenesis;metabolic process;regulation of biological process;response to stimulus	mitochondrion	catalytic activity;nucleotide binding;RNA binding	Pf00009, Pf00071, Pf01926, Pf03144, Pf08477, Pf09439, Pf11987	4528	Yes	No
P46777	60S ribosomal protein L5 [OS=Homo sapiens]	34.3	cell organization and biogenesis;metabolic process;regulation of biological process;transport	cytoplasm;cytosol;membrane;nucleus;ribosome	protein binding;RNA binding;structural molecule activity	Pf00861, Pf14204	6125	No	No
P49327	Fatty acid synthase [OS=Homo sapiens]	273.3	cell differentiation;metabolic process;regulation of biological process;response to stimulus	cytoplasm;cytosol;Golgi;membrane;mitochondrion	catalytic activity;nucleotide binding;protein binding;RNA binding	Pf00106, Pf00107, Pf00108, Pf00109, Pf00698, Pf00975, Pf02801, Pf08242, Pf08659, Pf13602, Pf14765	2194	Yes	No
P49411	elongation factor Tu, mitochondrial [OS=Homo sapiens]	49.5	metabolic process;response to stimulus	membrane;mitochondrion	catalytic activity;nucleotide binding;protein binding;RNA binding	Pf00009, Pf03143, Pf03144	7284	Yes	No
P49419	Alpha-aminoadipic semialdehyde dehydrogenase [OS=Homo sapiens]	58.5	metabolic process	cytoplasm;cytosol;mitochondrion;nucleus;organelle lumen	catalytic activity;protein binding	Pf00171	501	Yes	No
P49454	Centromere protein F [OS=Homo sapiens]	367.5	cell differentiation;cell division;cell organization and biogenesis;cell proliferation;development;metabolic process;regulation of biological process;response to stimulus;transport	chromosome;cytoplasm;cytoskeleton;cytosol;nucleus	catalytic activity;motor activity;protein binding;transporter activity	Pf01496, Pf01576, Pf02463, Pf04111, Pf04156, Pf05557, Pf06160, Pf07888, Pf09726, Pf10473, Pf10481, Pf10490, Pf12128, Pf13166	1063	No	Yes	Nat. Commun., 2015, 6, 8015.
P49748-3	Isoform 3 of Very long-chain specific acyl-CoA dehydrogenase, mitochondrial [OS=Homo sapiens]	72.9	cell differentiation;metabolic process;regulation of biological process;response to stimulus	cytosol;membrane;mitochondrion;nucleus;organelle lumen	catalytic activity;nucleotide binding	Pf00441, Pf02770, Pf02771, Pf08028	37	Yes	No
P49821	NADH dehydrogenase [ubiquinone] flavoprotein 1, mitochondrial [OS=Homo sapiens]	50.8	cell organization and biogenesis;metabolic process;transport	cytosol;membrane;mitochondrion	catalytic activity;metal ion binding;nucleotide binding	Pf01512, Pf10531, Pf10589	4723	Yes	No
P51649-2	Isoform 2 of Succinate-semialdehyde dehydrogenase, mitochondrial [OS=Homo sapiens]	58.6	cell organization and biogenesis;metabolic process	mitochondrion;organelle lumen	catalytic activity;nucleotide binding;protein binding	Pf00171	7915	Yes	No
P52597	Heterogeneous nuclear ribonucleoprotein F [OS=Homo sapiens]	45.6	metabolic process;regulation of biological process;response to stimulus	cytosol;membrane;nucleus;spliceosomal complex	protein binding;RNA binding	Pf00076, Pf08080, Pf14259	3185	No	No
P54098	DNA polymerase subunit gamma-1 [OS=Homo sapiens]	139.5	cellular homeostasis;metabolic process;response to stimulus	mitochondrion	catalytic activity;DNA binding;protein binding	Pf00476	5428	Yes	No
P54886	delta-1-pyrroline-5-carboxylate synthase [OS=Homo sapiens]	87.2	metabolic process	cytoplasm;cytosol;membrane;mitochondrion	catalytic activity;nucleotide binding;protein binding;RNA binding	Pf00171, Pf00696	5832	Yes	No
P55809	Succinyl-CoA:3-ketoacid coenzyme A transferase 1, mitochondrial [OS=Homo sapiens]	56.1	metabolic process;regulation of biological process;response to stimulus	mitochondrion;organelle lumen	catalytic activity;protein binding	Pf01144	5019	Yes	No
P56134	ATP synthase subunit f, mitochondrial [OS=Homo sapiens]	10.9	cell organization and biogenesis;metabolic process;transport	membrane;mitochondrion;nucleus	catalytic activity;transporter activity	Pf10206	9551	Yes	No
P61978-2	Isoform 2 of Heterogeneous nuclear ribonucleoprotein K [OS=Homo sapiens]	51	metabolic process;regulation of biological process;response to stimulus	cytoplasm;membrane;nucleus;spliceosomal complex	DNA binding;protein binding;RNA binding	Pf00013, Pf08067, Pf13014, Pf13083	3190	No	Yes	FEBS Letters, 2006, 580, 1839.
P62266	40S ribosomal protein S23 [OS=Homo sapiens]	15.8	cell organization and biogenesis;metabolic process;transport	cytosol;membrane;ribosome	protein binding;RNA binding;structural molecule activity	Pf00164	6228	No	No
P62736	Actin, aortic smooth muscle [OS=Homo sapiens]	42	regulation of biological process;response to stimulus	cytoplasm;cytoskeleton;cytosol	nucleotide binding;protein binding	Pf00022	59	No	No
P63000-2	Isoform B of Ras-related C3 botulinum toxin substrate 1 [OS=Homo sapiens]	23.5	cell organization and biogenesis;cell proliferation;cellular component movement;coagulation;defense response;metabolic process;regulation of biological process;response to stimulus;transport	cytoplasm;cytosol;membrane	catalytic activity;nucleotide binding;protein binding	Pf00071, Pf08477	5879	No	No
P68032	Actin, alpha cardiac muscle 1 [OS=Homo sapiens]	42	cell death;cell organization and biogenesis;cellular component movement;regulation of biological process;response to stimulus	cytoplasm;cytoskeleton;cytosol;membrane	catalytic activity;nucleotide binding;protein binding	Pf00022	70	No	No
P68363	Tubulin alpha-1B chain [OS=Homo sapiens]	50.1	cell division;cell organization and biogenesis;response to stimulus;transport	cytoplasm;cytoskeleton;membrane	catalytic activity;nucleotide binding;protein binding;RNA binding;structural molecule activity	Pf00091, Pf03953	10376	No	No
P68371	Tubulin beta-4B chain [OS=Homo sapiens]	49.8	cell organization and biogenesis;cellular component movement;defense response;regulation of biological process;response to stimulus;transport	cytoplasm;cytoskeleton;cytosol;extracellular;nucleus;organelle lumen	catalytic activity;nucleotide binding;protein binding;RNA binding;structural molecule activity	Pf00091, Pf03953, Pf10644	10383	No	No
P78417	Glutathione S-transferase omega-1 [OS=Homo sapiens]	27.5	cellular homeostasis;metabolic process;regulation of biological process;response to stimulus	cytoplasm;cytosol	antioxidant activity;catalytic activity;protein binding	Pf00043, Pf00462, Pf02798, Pf13409, Pf13417, Pf14497	9446	No	Yes	Nucleic Acids Res., 2016, 44, D1251.
P82673-1	28S ribosomal protein S35, mitochondrial [OS=Homo sapiens]	36.8	cell organization and biogenesis;metabolic process;response to stimulus	membrane;mitochondrion;ribosome	RNA binding;structural molecule activity	Pf10213	60488	Yes	No
P82675	28S ribosomal protein S5, mitochondrial [OS=Homo sapiens]	48	cell organization and biogenesis;metabolic process	membrane;mitochondrion;ribosome	RNA binding;structural molecule activity	Pf00333, Pf03719	64969	Yes	No
P82932	28S ribosomal protein S6, mitochondrial [OS=Homo sapiens]	14.2	cell organization and biogenesis;metabolic process	membrane;mitochondrion;ribosome	protein binding;RNA binding;structural molecule activity	Pf01250	64968	Yes	No
Q00059	Transcription factor A, mitochondrial [OS=Homo sapiens]	29.1	cell organization and biogenesis;metabolic process;regulation of biological process	cytosol;mitochondrion;nucleus;organelle lumen	DNA binding;protein binding;RNA binding	Pf00505, Pf09011	7019	Yes	No
Q00325-1	Phosphate carrier protein, mitochondrial [OS=Homo sapiens]	40.1	transport	membrane;mitochondrion	protein binding;transporter activity	Pf00153	5250	Yes	No
Q00325-2	Isoform B of Phosphate carrier protein, mitochondrial [OS=Homo sapiens]	39.9	transport	membrane;mitochondrion	protein binding;transporter activity	Pf00153	5250	Yes	No
Q00839	Heterogeneous nuclear ribonucleoprotein U [OS=Homo sapiens]	90.5	cell differentiation;metabolic process;regulation of biological process;response to stimulus	cell surface;chromosome;cytoplasm;membrane;nucleus;spliceosomal complex	DNA binding;nucleotide binding;protein binding;RNA binding	Pf00622, Pf13671	3192	No	No
Q01650	large neutral amino acids transporter small subunit 1 [OS=Homo sapiens]	55	cell differentiation;cellular component movement;development;metabolic process;transport	cytoplasm;cytosol;membrane	protein binding;transporter activity	Pf00324, Pf13520	8140	No	No
Q02218	2-oxoglutarate dehydrogenase, mitochondrial [OS=Homo sapiens]	115.9	cellular component movement;metabolic process	cytosol;membrane;mitochondrion;organelle lumen	catalytic activity;metal ion binding;protein binding	Pf00676, Pf02779	4967	Yes	No
Q05932-1	Folylpolyglutamate synthase, mitochondrial [OS=Homo sapiens]	64.6	cell proliferation;metabolic process	cytoplasm;cytosol;membrane;mitochondrion;organelle lumen	catalytic activity;metal ion binding;nucleotide binding	Pf02875	2356	Yes	No
Q07021	Complement component 1 Q subcomponent-binding protein, mitochondrial [OS=Homo sapiens]	31.3	cell death;cell organization and biogenesis;defense response;metabolic process;regulation of biological process;response to stimulus	cell surface;cytoplasm;cytosol;extracellular;membrane;mitochondrion;nucleus;organelle lumen	protein binding;RNA binding	Pf02330	708	Yes	No
Q08J23	tRNA (Cytosine(34)-C(5))-methyltransferase [OS=Homo sapiens]	86.4	cell division;metabolic process	cytoplasm;cytoskeleton;nucleus	catalytic activity;RNA binding	Pf01189, Pf13659	54888	No	No
Q10713	Mitochondrial-processing peptidase subunit alpha [OS=Homo sapiens]	58.2	metabolic process;transport	membrane;mitochondrion;organelle lumen	catalytic activity;metal ion binding	Pf00675, Pf05193	23203	Yes	No
Q12830-1	Nucleosome-remodeling factor subunit BPTF [OS=Homo sapiens]	338.1	cell organization and biogenesis;metabolic process;regulation of biological process;response to stimulus	cytoplasm;nucleus	catalytic activity;DNA binding;metal ion binding;protein binding	Pf00439, Pf00628, Pf02791, Pf15612	2186	No	No
Q12849	G-rich sequence factor 1 [OS=Homo sapiens]	53.1	metabolic process	cytoplasm;mitochondrion	RNA binding	Pf00076, Pf14259	2926	Yes	No
Q12931	heat shock protein 75 kDa, mitochondrial [OS=Homo sapiens]	80.1	metabolic process;regulation of biological process;response to stimulus	membrane;mitochondrion;organelle lumen	nucleotide binding;protein binding;RNA binding	Pf00183, Pf02518, Pf13589	10131	Yes	No
Q13084	39S ribosomal protein L28, mitochondrial [OS=Homo sapiens]	30.1	cell organization and biogenesis;metabolic process	cytosol;membrane;mitochondrion;ribosome	protein binding;RNA binding;structural molecule activity	Pf00830	10573	Yes	No
Q13573	SNW domain-containing protein 1 [OS=Homo sapiens]	61.5	cell organization and biogenesis;metabolic process;regulation of biological process;response to stimulus	nucleus;spliceosomal complex	catalytic activity;protein binding;RNA binding	Pf02731	22938	No	No
Q14315	Filamin-C [OS=Homo sapiens]	290.8	cell organization and biogenesis	cytoplasm;cytoskeleton;cytosol;membrane	protein binding	Pf00307, Pf00630	2318	No	No
Q14CZ7	FAST kinase domain-containing protein 3, mitochondrial [OS=Homo sapiens]	75.6	metabolic process	mitochondrion;nucleus	catalytic activity;protein binding;RNA binding	Pf06743, Pf08368, Pf08373	79072	Yes	No
Q15031	Probable Leucine--tRNA ligase, mitochondrial [OS=Homo sapiens]	101.9	cell organization and biogenesis;metabolic process;regulation of biological process	mitochondrion;organelle lumen	catalytic activity;nucleotide binding	Pf00133, Pf08264, Pf09334, Pf13603	23395	Yes	No
Q15058	Kinesin-like protein KIF14 [OS=Homo sapiens]	186.4	cell division;cell organization and biogenesis;cell proliferation;cellular component movement;metabolic process;regulation of biological process	cytoplasm;cytoskeleton;cytosol;membrane;nucleus	catalytic activity;motor activity;nucleotide binding;protein binding	Pf00225, Pf00498, Pf00769, Pf01576, Pf02463, Pf02841, Pf05262, Pf05622, Pf09726, Pf09731, Pf11068, Pf11740, Pf12128, Pf13514, Pf13868	9928	No	No
Q15084-2	Isoform 2 of Protein disulfide-isomerase A6 [OS=Homo sapiens]	53.9	cellular homeostasis;metabolic process;regulation of biological process;response to stimulus;transport	cytosol;endoplasmic reticulum;membrane;organelle lumen	catalytic activity;protein binding	Pf00085, Pf13098, Pf13848, Pf13899, Pf13905	10130	No	No
Q15118-2	Isoform 2 of [Pyruvate dehydrogenase (acetyl-transferring)] kinase isozyme 1, mitochondrial [OS=Homo sapiens]	51.6	cell proliferation;metabolic process;regulation of biological process;response to stimulus	mitochondrion;nucleus;organelle lumen	catalytic activity;nucleotide binding;protein binding	Pf02518, Pf10436	5163	Yes	No
Q15119-1	[Pyruvate dehydrogenase (acetyl-transferring)] kinase isozyme 2, mitochondrial [OS=Homo sapiens]	46.1	cell communication;metabolic process;regulation of biological process;response to stimulus	cytosol;mitochondrion;organelle lumen	catalytic activity;nucleotide binding;protein binding	Pf02518, Pf10436	5164	Yes	No
Q15233	Non-POU domain-containing octamer-binding protein [OS=Homo sapiens]	54.2	defense response;metabolic process;regulation of biological process;response to stimulus	membrane;nucleus	DNA binding;protein binding;RNA binding	Pf00076, Pf08075, Pf13893, Pf14259	4841	No	No
Q15365	Poly(RC)-binding protein 1 [OS=Homo sapiens]	37.5	metabolic process;regulation of biological process	cytoplasm;cytosol;membrane;nucleus	DNA binding;protein binding;RNA binding	Pf00013, Pf13014	5093	No	No
Q16654	[Pyruvate dehydrogenase (acetyl-transferring)] kinase isozyme 4, mitochondrial [OS=Homo sapiens]	46.4	cell communication;metabolic process;regulation of biological process;response to stimulus	membrane;mitochondrion;organelle lumen	catalytic activity;nucleotide binding	Pf02518, Pf10436	5166	Yes	No
Q16658	Fascin [OS=Homo sapiens]	54.5	cell organization and biogenesis;cell proliferation;cellular component movement;regulation of biological process	cytoplasm;cytoskeleton;cytosol	protein binding;RNA binding	Pf06268	6624	No	No
Q16698	2,4-dienoyl-CoA reductase, mitochondrial [OS=Homo sapiens]	36	cell organization and biogenesis;metabolic process	cytosol;mitochondrion;nucleus;organelle lumen	catalytic activity;nucleotide binding	Pf00106, Pf08659, Pf13561	1666	Yes	No
Q16762	thiosulfate sulfurtransferase [OS=Homo sapiens]	33.4	cell differentiation;metabolic process;transport	membrane;mitochondrion;organelle lumen	catalytic activity;RNA binding	Pf00581	7263	Yes	No
Q16795	NADH dehydrogenase [ubiquinone] 1 alpha subcomplex subunit 9, mitochondrial [OS=Homo sapiens]	42.5	cell organization and biogenesis;metabolic process;transport	membrane;mitochondrion;nucleus;organelle lumen	catalytic activity;protein binding	Pf01073, Pf01370, Pf05368	4704	Yes	No
Q16881-1	Thioredoxin reductase 1, cytoplasmic [OS=Homo sapiens]	70.9	cell proliferation;cellular homeostasis;metabolic process;regulation of biological process;response to stimulus;transport	cytoplasm;cytosol;mitochondrion;nucleus	antioxidant activity;catalytic activity;nucleotide binding;protein binding	Pf00070, Pf00462, Pf02852, Pf07992, Pf13738	7296	Yes	No
Q3KQZ1-1	Solute carrier family 25 member 35 [OS=Homo sapiens]	32.4	transport	membrane;mitochondrion	transporter activity	Pf00153	399512	Yes	No
Q4G0N4	NAD kinase 2, mitochondrial [OS=Homo sapiens]	49.4	metabolic process	mitochondrion;organelle lumen	catalytic activity;nucleotide binding;protein binding	Pf00781, Pf01513	133686	Yes	No
Q4G176	Acyl-CoA synthetase family member 3, mitochondrial [OS=Homo sapiens]	64.1	metabolic process	mitochondrion;organelle lumen	catalytic activity;nucleotide binding	Pf00501, Pf13193	197322	Yes	No
Q4J6C6	prolyl endopeptidase-like [OS=Homo sapiens]	83.9	metabolic process;regulation of biological process	cytoplasm;cytoskeleton;cytosol;Golgi	catalytic activity	Pf00326, Pf02897	9581	No	Yes	Nucleic Acids Res., 2016, 44, D1251.
Q53R41	FAST kinase domain-containing protein 1, mitochondrial [OS=Homo sapiens]	97.3	metabolic process	mitochondrion	catalytic activity;RNA binding	Pf06743, Pf08368, Pf08373	79675	Yes	No
Q5JPH6-2	Isoform 2 of Probable glutamate--tRNA ligase, mitochondrial [OS=Homo sapiens]	60	metabolic process	mitochondrion;organelle lumen	catalytic activity;metal ion binding;nucleotide binding;RNA binding	Pf00749	124454	Yes	No
Q5JRX3-2	Isoform 2 of Presequence protease, mitochondrial [OS=Homo sapiens]	117.4	metabolic process;regulation of biological process	mitochondrion;organelle lumen	catalytic activity;enzyme regulator activity;metal ion binding	Pf00675, Pf05193, Pf08367	10531	Yes	No
Q5JTZ9	alanine--tRNA ligase, mitochondrial [OS=Homo sapiens]	107.3	cell organization and biogenesis;metabolic process	cytoplasm;mitochondrion	catalytic activity;metal ion binding;nucleotide binding;RNA binding	Pf01411, Pf07973	57505	Yes	No
Q5ST30-4	Isoform 4 of Valine--tRNA ligase, mitochondrial [OS=Homo sapiens]	121.5	metabolic process;regulation of biological process	cytosol;mitochondrion	catalytic activity;nucleotide binding	Pf00133, Pf08264, Pf09334	57176	Yes	No
Q5T160	probable arginine--tRNA ligase, mitochondrial [OS=Homo sapiens]	65.5	cell organization and biogenesis;metabolic process	cytoplasm;mitochondrion;organelle lumen	catalytic activity;nucleotide binding;RNA binding	Pf00750, Pf05746	57038	Yes	No
Q5T1J5	Putative coiled-coil-helix-coiled-coil-helix domain-containing protein CHCHD2P9, mitochondrial [OS=Homo sapiens]	15.5	cell organization and biogenesis;regulation of biological process	mitochondrion;nucleus	DNA binding		645345	Yes	No
Q5T440	Putative transferase CAF17, mitochondrial [OS=Homo sapiens]	38.1	cell organization and biogenesis;metabolic process	mitochondrion;organelle lumen	catalytic activity;RNA binding	Pf01571, Pf08669	200205	Yes	No
Q5T9A4	ATPase family AAA domain-containing protein 3B [OS=Homo sapiens]	72.5	transport	membrane;mitochondrion	catalytic activity;nucleotide binding;RNA binding	Pf00004, Pf00910, Pf01078, Pf05707, Pf07726, Pf07728, Pf12037, Pf13207, Pf13401	83858	Yes	No
Q5TC12-1	ATP synthase mitochondrial F1 complex assembly factor 1 [OS=Homo sapiens]	36.4	cell organization and biogenesis	mitochondrion	protein binding	Pf06644	64756	Yes	No
Q5TFE4	5'-nucleotidase domain-containing protein 1 [OS=Homo sapiens]	51.8	metabolic process		catalytic activity;metal ion binding;receptor activity;signal transducer activity	Pf05761	221294	No	No
Q5U5X0	Complex III assembly factor LYRM7 [OS=Homo sapiens]	11.9	cell organization and biogenesis;metabolic process	membrane;mitochondrion;organelle lumen	protein binding	Pf05347, Pf13232	90624	Yes	No
Q6L8Q7-1	2',5'-phosphodiesterase 12 [OS=Homo sapiens]	67.3	metabolic process;regulation of biological process;response to stimulus	mitochondrion;organelle lumen	catalytic activity;metal ion binding	Pf03372	201626	Yes	No
Q6P087	RNA pseudouridylate synthase domain-containing protein 3 [OS=Homo sapiens]	38.4	metabolic process	mitochondrion;organelle lumen	catalytic activity;protein binding;RNA binding	Pf00849	285367	Yes	No
Q6P1X6	UPF0598 protein C8orf82 [OS=Homo sapiens]	23.9				Pf14956	414919	No	Yes	Nucleic Acids Res., 2016, 44, D1251.
Q6P4H8-1	Protein FAM173B [OS=Homo sapiens]	26.1		membrane		Pf12847, Pf13489, Pf13659	134145	No	Yes	Nucleic Acids Res., 2017, 45, D158
Q6PI48	Aspartate--tRNA ligase, mitochondrial [OS=Homo sapiens]	73.5	metabolic process	cytoplasm;mitochondrion;nucleus;organelle lumen	catalytic activity;nucleotide binding;protein binding;RNA binding	Pf00152, Pf00587, Pf01336, Pf02938	55157	Yes	No
Q6UB35-1	Monofunctional C1-tetrahydrofolate synthase, mitochondrial [OS=Homo sapiens]	105.7	metabolic process	membrane;mitochondrion;organelle lumen	catalytic activity;nucleotide binding;protein binding	Pf00763, Pf01268, Pf02882	25902	Yes	No
Q6YN16	Hydroxysteroid dehydrogenase-like protein 2 [OS=Homo sapiens]	45.4	metabolic process	membrane;mitochondrion	catalytic activity	Pf00106, Pf02036, Pf13561, Pf14864	84263	Yes	No
Q7L0Y3	Mitochondrial ribonuclease P protein 1 [OS=Homo sapiens]	47.3	cell organization and biogenesis;metabolic process;regulation of biological process	mitochondrion;organelle lumen	catalytic activity;protein binding;RNA binding	Pf01746	54931	Yes	No
Q7L2E3-2	Isoform 2 of Putative ATP-dependent RNA helicase DHX30 [OS=Homo sapiens]	136	cell organization and biogenesis;metabolic process	cytosol;mitochondrion	catalytic activity;nucleotide binding;protein binding;RNA binding	Pf00270, Pf00271, Pf04408, Pf07717	22907	Yes	No
Q7L592	Protein arginine methyltransferase NDUFAF7, mitochondrial [OS=Homo sapiens]	49.2	cell organization and biogenesis;metabolic process	mitochondrion;organelle lumen	catalytic activity;protein binding	Pf02636	55471	Yes	No
Q7L8L6	FAST kinase domain-containing protein 5, mitochondrial [OS=Homo sapiens]	86.5	cell organization and biogenesis;metabolic process	mitochondrion	catalytic activity;protein binding;RNA binding	Pf06743, Pf08368, Pf08373	60493	Yes	No
Q7Z7H8-2	Isoform 2 of 39S ribosomal protein L10, mitochondrial [OS=Homo sapiens]	30.3	cell organization and biogenesis;metabolic process	membrane;mitochondrion	protein binding;RNA binding;structural molecule activity	Pf00466	124995	Yes	No
Q86UT6	NLR family member X1 [OS=Homo sapiens]	107.5	defense response;regulation of biological process;response to stimulus	membrane;mitochondrion	nucleotide binding;protein binding	Pf05729	79671	Yes	No
Q86V42-2	Isoform 2 of Protein FAM124A [OS=Homo sapiens]	64.3			protein binding	Pf15067	220108	No	No
Q86X76	Nitrilase homolog 1 [OS=Homo sapiens]	35.9	metabolic process	cytoplasm;mitochondrion;nucleus	catalytic activity	Pf00795	4817	Yes	No
Q86X76-3	Isoform 4 of Nitrilase homolog 1 [OS=Homo sapiens]	40.2	metabolic process	mitochondrion;nucleus	catalytic activity	Pf00795	4817	Yes	No
Q86Y79	Probable peptidyl-tRNA hydrolase [OS=Homo sapiens]	22.9		mitochondrion	catalytic activity;protein binding;RNA binding	Pf01195	138428	Yes	No
Q86YH6-1	Decaprenyl-diphosphate synthase subunit 2 [OS=Homo sapiens]	44.1	cell organization and biogenesis;metabolic process	cytosol;mitochondrion;organelle lumen	catalytic activity;protein binding	Pf00348	57107	Yes	No
Q8IVS2	Malonyl-CoA-acyl carrier protein transacylase, mitochondrial [OS=Homo sapiens]	42.9	metabolic process	mitochondrion;organelle lumen	catalytic activity;RNA binding	Pf00698	27349	Yes	No
Q8IYQ7	Threonine synthase-like 1 [OS=Homo sapiens]	83			nucleotide binding	Pf00004, Pf00291, Pf01202, Pf13207, Pf13238, Pf13671, Pf14821	79896	No	Yes	Science, 2017, 356, 6340. Human Protein Atlas available from www.proteinatlas.org
Q8N0V3-1	Putative ribosome-binding factor A, mitochondrial [OS=Homo sapiens]	38.3	metabolic process	mitochondrion	catalytic activity;protein binding	Pf02033, Pf02637	79863	Yes	No
Q8N8Q8-1	Mitochondrial inner membrane protein COX18 [OS=Homo sapiens]	37	cell organization and biogenesis;transport	membrane;mitochondrion	transporter activity	Pf02096	285521	Yes	No
Q8N983-7	Isoform 6 of 39S ribosomal protein L43, mitochondrial [OS=Homo sapiens]	28.7	cell organization and biogenesis;metabolic process	membrane;ribosome	protein binding;RNA binding;structural molecule activity	Pf05047	84545	No	Yes	Nucleic Acids Res., 2016, 44, D1251.
Q8NC60	Nitric oxide-associated protein 1 [OS=Homo sapiens]	78.4	cell death;cell organization and biogenesis;metabolic process;regulation of biological process	membrane;mitochondrion	catalytic activity;nucleotide binding;protein binding;RNA binding	Pf01926, Pf02421, Pf03193	84273	Yes	No
Q8NFF5	FAD synthase [OS=Homo sapiens]	65.2	metabolic process	cytoplasm;cytosol;membrane;mitochondrion;organelle lumen	catalytic activity;nucleotide binding;protein binding	Pf00994, Pf01507	80308	Yes	No
Q8TCS8	Polyribonucleotide nucleotidyltransferase 1, mitochondrial [OS=Homo sapiens]	85.9	cell organization and biogenesis;metabolic process;regulation of biological process;response to stimulus;transport	cytoplasm;cytosol;membrane;mitochondrion;nucleus;ribosome	catalytic activity;protein binding;RNA binding	Pf00013, Pf00575, Pf01138, Pf03725, Pf03726	87178	Yes	No
Q8WVM0	Dimethyladenosine transferase 1, mitochondrial [OS=Homo sapiens]	39.5	cell organization and biogenesis;metabolic process;regulation of biological process	mitochondrion;organelle lumen	catalytic activity;DNA binding;protein binding;RNA binding	Pf00398	51106	Yes	No
Q92552-2	Isoform 2 of 28S ribosomal protein S27, mitochondrial [OS=Homo sapiens]	49.1	cell organization and biogenesis;cell proliferation;metabolic process;regulation of biological process	cytoplasm;membrane;mitochondrion	protein binding;RNA binding	Pf10037, Pf12854, Pf13041	23107	Yes	No
Q92665	28S ribosomal protein S31, mitochondrial [OS=Homo sapiens]	45.3	cell organization and biogenesis;metabolic process	membrane;mitochondrion;ribosome	protein binding;RNA binding;structural molecule activity	Pf15433	10240	Yes	No
Q92901	60S ribosomal protein L3-like [OS=Homo sapiens]	46.3	cell organization and biogenesis;metabolic process	membrane;ribosome	RNA binding;structural molecule activity	Pf00297	6123	No	No
Q92903	Phosphatidate cytidylyltransferase 1 [OS=Homo sapiens]	53.3	metabolic process;regulation of biological process;response to stimulus	endoplasmic reticulum;membrane	catalytic activity	Pf01148	1040	No	No
Q92945	Far upstream element-binding protein 2 [OS=Homo sapiens]	73.1	metabolic process;regulation of biological process;response to stimulus;transport	cytoplasm;cytosol;membrane;nucleus	DNA binding;protein binding;RNA binding	Pf00013, Pf07650, Pf09005, Pf13014	8570	No	No
Q92947-1	Glutaryl-CoA dehydrogenase, mitochondrial [OS=Homo sapiens]	48.1	metabolic process	mitochondrion;organelle lumen	catalytic activity;nucleotide binding	Pf00441, Pf02770, Pf02771, Pf08028	2639	Yes	No
Q969Z0-1	Protein TBRG4 [OS=Homo sapiens]	70.7	metabolic process;regulation of biological process	mitochondrion	catalytic activity;protein binding;RNA binding	Pf06743, Pf08368, Pf08373	9238	Yes	No
Q96C36	Pyrroline-5-carboxylate reductase 2 [OS=Homo sapiens]	33.6	metabolic process;response to stimulus	cytoplasm;mitochondrion;organelle lumen	catalytic activity;nucleotide binding	Pf01210, Pf03807, Pf14748	29920	Yes	No
Q96CB9	5-methylcytosine rRNA methyltransferase NSUN4 [OS=Homo sapiens]	43.1	cell organization and biogenesis;metabolic process;regulation of biological process	mitochondrion;organelle lumen	catalytic activity;protein binding;RNA binding	Pf01189, Pf12847, Pf13659	387338	Yes	No
Q96CM3	RNA pseudouridylate synthase domain-containing protein 4 [OS=Homo sapiens]	42.2	metabolic process	mitochondrion;organelle lumen	catalytic activity;protein binding;RNA binding	Pf00849	84881	Yes	No
Q96CU9	FAD-dependent oxidoreductase domain-containing protein 1 [OS=Homo sapiens]	53.8	cell organization and biogenesis;metabolic process;transport	membrane;mitochondrion	catalytic activity	Pf01266	55572	Yes	No
Q96D53-1	Atypical kinase COQ8B, mitochondrial [OS=Homo sapiens]	60	metabolic process	cytoplasm;cytosol;membrane;mitochondrion	catalytic activity;nucleotide binding	Pf03109	79934	Yes	No
Q96EY7-1	pentatricopeptide repeat domain-containing protein 3, mitochondrial [OS=Homo sapiens]	78.5	cell organization and biogenesis;metabolic process;regulation of biological process	cytosol;membrane;mitochondrion;ribosome	protein binding;RNA binding	Pf13041, Pf13812	55037	Yes	No
Q96EY8	Cob(I)yrinic acid a,c-diamide adenosyltransferase, mitochondrial [OS=Homo sapiens]	27.4	metabolic process	mitochondrion;organelle lumen	catalytic activity;nucleotide binding;protein binding	Pf01923	326625	Yes	No
Q96I59	probable asparagine--tRNA ligase, mitochondrial [OS=Homo sapiens]	54.1	metabolic process	cytoplasm;cytosol;mitochondrion;organelle lumen	catalytic activity;nucleotide binding	Pf00152, Pf01336	79731	Yes	No
Q96IR7	4-hydroxyphenylpyruvate dioxygenase-like protein [OS=Homo sapiens]	39.4	metabolic process		catalytic activity;metal ion binding	Pf12681	84842	No	Yes	Science, 2017, 356, 6340. Human Protein Atlas available from www.proteinatlas.org
Q96JB2-1	Conserved oligomeric Golgi complex subunit 3 [OS=Homo sapiens]	94	cell organization and biogenesis;metabolic process;regulation of biological process;transport	Golgi;membrane	protein binding;transporter activity	Pf04136	83548	No	No
Q96JN2-4	Isoform 4 of Coiled-coil domain-containing protein 136 [OS=Homo sapiens]	134.6	cell organization and biogenesis	membrane			64753	No	No
Q96RP9	Elongation factor G, mitochondrial [OS=Homo sapiens]	83.4	metabolic process	mitochondrion;organelle lumen	catalytic activity;nucleotide binding;protein binding;RNA binding	Pf00009, Pf00679, Pf03144, Pf03764, Pf14492	85476	Yes	No
Q96RP9-2	Isoform 2 of Elongation factor G, mitochondrial [OS=Homo sapiens]	85.8	metabolic process	mitochondrion;organelle lumen	catalytic activity;nucleotide binding;protein binding;RNA binding	Pf00009, Pf00679, Pf03144, Pf03764, Pf14492	85476	Yes	No
Q96SZ6	CDK5 regulatory subunit-associated protein 1 [OS=Homo sapiens]	67.6	cell organization and biogenesis;metabolic process;regulation of biological process	cytoplasm;mitochondrion	catalytic activity;metal ion binding;protein binding	Pf00919, Pf01938, Pf04055	51654	Yes	No
Q99714-1	3-hydroxyacyl-CoA dehydrogenase type-2 [OS=Homo sapiens]	26.9	cell organization and biogenesis;metabolic process	cytoplasm;membrane;mitochondrion;organelle lumen	catalytic activity;protein binding;RNA binding	Pf00106, Pf08659, Pf13561	3028	Yes	No
Q99757	Thioredoxin, mitochondrial [OS=Homo sapiens]	18.4	cell communication;cellular homeostasis;metabolic process;regulation of biological process;response to stimulus;transport	mitochondrion;organelle lumen	catalytic activity;protein binding	Pf00085, Pf13098, Pf13899, Pf13905	25828	Yes	No
Q99797	Mitochondrial intermediate peptidase [OS=Homo sapiens]	80.6	metabolic process	mitochondrion;organelle lumen	catalytic activity;metal ion binding	Pf01432	4285	Yes	No
Q99832	T-complex protein 1 subunit eta [OS=Homo sapiens]	59.3	metabolic process;regulation of biological process;transport	cytoplasm;cytosol;mitochondrion	nucleotide binding;protein binding	Pf00118	10574	Yes	No
Q9BQ52-1	Zinc phosphodiesterase ELAC protein 2 [OS=Homo sapiens]	92.2	cell organization and biogenesis;metabolic process	mitochondrion;nucleus;organelle lumen	catalytic activity;metal ion binding;RNA binding	Pf00753, Pf12706, Pf13691	60528	Yes	No
Q9BQ69	O-acetyl-ADP-ribose deacetylase MACROD1 [OS=Homo sapiens]	35.5	metabolic process;response to stimulus	membrane;mitochondrion;nucleus	catalytic activity;protein binding	Pf00820, Pf01661	28992	Yes	No
Q9BQP7	mitochondrial genome maintenance exonuclease 1 [OS=Homo sapiens]	39.4	cell organization and biogenesis;metabolic process;response to stimulus	mitochondrion	catalytic activity;DNA binding		92667	Yes	No
Q9BRJ2	39S ribosomal protein L45, mitochondrial [OS=Homo sapiens]	35.3	cell organization and biogenesis;metabolic process	membrane;mitochondrion;ribosome	protein binding;RNA binding	Pf04280	84311	Yes	No
Q9BRX8-1	Redox-regulatory protein FAM213A [OS=Homo sapiens]	25.7	metabolic process;regulation of biological process	cytoplasm;extracellular	antioxidant activity;catalytic activity	Pf13911	84293	No	No
Q9BSH5	Haloacid dehalogenase-like hydrolase domain-containing protein 3 [OS=Homo sapiens]	28	metabolic process	mitochondrion	catalytic activity;protein binding	Pf00702, Pf13242, Pf13419	81932	Yes	No
Q9BSJ5-1	Uncharacterized protein C17orf80 [OS=Homo sapiens]	67.3		membrane			55028	No	No
Q9BT17-1	Mitochondrial ribosome-associated GTPase 1 [OS=Homo sapiens]	37.2	regulation of biological process	membrane;mitochondrion;organelle lumen;ribosome	catalytic activity;nucleotide binding	Pf00009, Pf01926, Pf02421, Pf03193	92170	Yes	No
Q9BVL4	Selenoprotein O [OS=Homo sapiens]	73.4		mitochondrion		Pf02696	83642	Yes	No
Q9BVS5	tRNA (adenine(58)-N(1))-methyltransferase, mitochondrial [OS=Homo sapiens]	52.9	cell organization and biogenesis;metabolic process	mitochondrion;organelle lumen	catalytic activity;protein binding	Pf08704	55006	Yes	No
Q9BW92	Threonine--tRNA ligase, mitochondrial [OS=Homo sapiens]	81	metabolic process;regulation of biological process	cytoplasm;mitochondrion;organelle lumen	catalytic activity;nucleotide binding;protein binding	Pf00587, Pf02824, Pf03129, Pf07973	80222	Yes	No
Q9BXW7	Haloacid dehalogenase-like hydrolase domain-containing 5 [OS=Homo sapiens]	46.3	metabolic process	mitochondrion		Pf13344	27440	Yes	No
Q9BZE1	39S ribosomal protein L37, mitochondrial [OS=Homo sapiens]	48.1	cell organization and biogenesis;metabolic process	membrane;mitochondrion;ribosome	RNA binding;structural molecule activity	Pf07147	51253	Yes	No
Q9GZM8-2	Isoform 2 of Nuclear distribution protein nudE-like 1 [OS=Homo sapiens]	40.6	cell growth;cell organization and biogenesis;cell proliferation;cellular component movement;metabolic process;regulation of biological process;response to stimulus;transport	chromosome;cytoskeleton;cytosol	catalytic activity;protein binding	Pf04880, Pf09731	81565	No	No
Q9H0R6-1	Glutamyl-tRNA(Gln) amidotransferase subunit A, mitochondrial [OS=Homo sapiens]	57.4	cell organization and biogenesis;metabolic process;regulation of biological process	mitochondrion	catalytic activity;nucleotide binding;protein binding	Pf01425	55278	Yes	No
Q9H1K1	Iron-sulfur cluster assembly enzyme ISCU, mitochondrial [OS=Homo sapiens]	18	cell organization and biogenesis;cellular homeostasis;metabolic process	cytoplasm;cytosol;mitochondrion;nucleus;organelle lumen	catalytic activity;metal ion binding;protein binding;structural molecule activity	Pf01592	23479	Yes	No
Q9H3N1	Thioredoxin-related transmembrane protein 1 [OS=Homo sapiens]	31.8	cellular homeostasis;metabolic process;regulation of biological process;response to stimulus;transport	endoplasmic reticulum;membrane	catalytic activity	Pf00085, Pf13098	81542	No	Yes	J. Cell Biol., 2016, 214, 433.
Q9H4K7	Mitochondrial ribosome-associated GTPase 2 [OS=Homo sapiens]	43.9	metabolic process;regulation of biological process	membrane;mitochondrion;organelle lumen;ribosome	catalytic activity;metal ion binding;nucleotide binding	Pf00025, Pf01018, Pf01926, Pf02421, Pf08438, Pf10662	26164	Yes	No
Q9H5Q4	Dimethyladenosine transferase 2, mitochondrial [OS=Homo sapiens]	45.3	cell organization and biogenesis;metabolic process;regulation of biological process	mitochondrion;organelle lumen	catalytic activity;RNA binding	Pf00398	64216	Yes	No
Q9H7Z7	Prostaglandin E synthase 2 [OS=Homo sapiens]	41.9	cellular homeostasis;metabolic process;regulation of biological process;transport	cytoplasm;cytosol;extracellular;Golgi;membrane;mitochondrion;nucleus;organelle lumen	catalytic activity;DNA binding;protein binding	Pf00043, Pf00462, Pf13409, Pf13410, Pf13417, Pf14497	80142	Yes	No
Q9H845	Acyl-CoA dehydrogenase family member 9, mitochondrial [OS=Homo sapiens]	68.7	cell organization and biogenesis;metabolic process	membrane;mitochondrion;nucleus	catalytic activity;nucleotide binding;protein binding	Pf00441, Pf02770, Pf02771, Pf08028	28976	Yes	No
Q9H857-2	Isoform 2 of 5'-nucleotidase domain-containing protein 2 [OS=Homo sapiens]	64.1	metabolic process		catalytic activity;metal ion binding	Pf05761	64943	No	Yes	Nucleic Acids Res., 2016, 44, D1251.
Q9H9J2	39S ribosomal protein L44, mitochondrial [OS=Homo sapiens]	37.5	cell organization and biogenesis;metabolic process	membrane;mitochondrion;nucleus;ribosome	catalytic activity;protein binding;RNA binding	Pf00636	65080	Yes	No
Q9H9P8-1	L-2-hydroxyglutarate dehydrogenase, mitochondrial [OS=Homo sapiens]	50.3	metabolic process	membrane;mitochondrion	catalytic activity	Pf01266	79944	Yes	No
Q9HA77	probable cysteine--tRNA ligase, mitochondrial [OS=Homo sapiens]	62.2	metabolic process	cytoplasm;mitochondrion;organelle lumen	catalytic activity;metal ion binding;nucleotide binding	Pf00133, Pf01406, Pf01921, Pf09334	79587	Yes	No
Q9HAV7	GrpE protein homolog 1, mitochondrial [OS=Homo sapiens]	24.3	metabolic process;regulation of biological process;transport	mitochondrion;nucleus;organelle lumen	enzyme regulator activity;nucleotide binding;protein binding	Pf01025	80273	Yes	No
Q9HC36	rRNA methyltransferase 3, mitochondrial [OS=Homo sapiens]	47	metabolic process	mitochondrion;organelle lumen	catalytic activity;protein binding;RNA binding	Pf00588, Pf08032	55178	Yes	No
Q9HCC0-1	Methylcrotonoyl-CoA carboxylase beta chain, mitochondrial [OS=Homo sapiens]	61.3	cell organization and biogenesis;metabolic process	cytosol;mitochondrion;organelle lumen	catalytic activity;nucleotide binding;protein binding	Pf01039	64087	Yes	No
Q9NNW7-1	thioredoxin reductase 2, mitochondrial [OS=Homo sapiens]	56.5	cellular homeostasis;metabolic process;regulation of biological process;response to stimulus	cytosol;mitochondrion;organelle lumen	antioxidant activity;catalytic activity;nucleotide binding;protein binding	Pf00070, Pf02852, Pf07992, Pf13738	10587	Yes	No
Q9NP81-1	Serine--tRNA ligase, mitochondrial [OS=Homo sapiens]	58.2	cell organization and biogenesis;metabolic process	cytoplasm;cytoskeleton;mitochondrion;organelle lumen	catalytic activity;nucleotide binding;RNA binding	Pf00587, Pf02403, Pf06160	54938	Yes	No
Q9NP81-2	Isoform 2 of Serine--tRNA ligase, mitochondrial [OS=Homo sapiens]	58	metabolic process	cytoplasm;mitochondrion;organelle lumen	catalytic activity;nucleotide binding;RNA binding	Pf00587	54938	Yes	No
Q9NP92	39S ribosomal protein S30, mitochondrial [OS=Homo sapiens]	50.3	cell death;cell organization and biogenesis;metabolic process	membrane;mitochondrion;ribosome	RNA binding;structural molecule activity	Pf07147	10884	Yes	No
Q9NQC3	Reticulon-4 [OS=Homo sapiens]	129.9	cell death;cell organization and biogenesis;cellular component movement;regulation of biological process	endoplasmic reticulum;membrane	protein binding;RNA binding	Pf02453	57142	No	No
Q9NQR4	Omega-amidase NIT2 [OS=Homo sapiens]	30.6	metabolic process;transport	cytoplasm;cytosol;extracellular;mitochondrion;organelle lumen	catalytic activity	Pf00795	56954	Yes	No
Q9NRL2	Bromodomain adjacent to zinc finger domain protein 1A [OS=Homo sapiens]	178.6	cell organization and biogenesis;metabolic process;regulation of biological process	nucleus	catalytic activity;metal ion binding;protein binding	Pf00439, Pf00628, Pf02791, Pf10537, Pf15612, Pf15614	11177	No	No
Q9NRP4	Succinate dehydrogenase assembly factor 3, mitochondrial [OS=Homo sapiens]	14.6	cell organization and biogenesis;metabolic process;regulation of biological process;response to stimulus	mitochondrion;organelle lumen		Pf05347, Pf13233	57001	Yes	No
Q9NSE4	Isoleucine--tRNA ligase, mitochondrial [OS=Homo sapiens]	113.7	metabolic process;regulation of biological process	cytoplasm;cytosol;mitochondrion;organelle lumen	catalytic activity;nucleotide binding;RNA binding	Pf00133, Pf06827, Pf08264, Pf09334, Pf13603	55699	Yes	No
Q9NTX5	Ethylmalonyl-CoA decarboxylase [OS=Homo sapiens]	33.7	metabolic process	cytoplasm;cytosol;mitochondrion	catalytic activity	Pf00378	55862	Yes	No
Q9NVH6-8	Isoform 8 of Trimethyllysine dioxygenase, mitochondrial [OS=Homo sapiens]	50.8	metabolic process	mitochondrion;organelle lumen	catalytic activity;metal ion binding	Pf02668	55217	Yes	No
Q9NVI7-2	Isoform 2 of ATPase family AAA domain-containing protein 3A [OS=Homo sapiens]	66.2	cell growth;regulation of biological process	membrane;mitochondrion	catalytic activity;nucleotide binding;RNA binding	Pf00004, Pf00910, Pf01078, Pf05707, Pf06745, Pf07728, Pf12037, Pf13207, Pf13401	55210	Yes	No
Q9NVS2	39S ribosomal protein S18a, mitochondrial [OS=Homo sapiens]	22.2	cell organization and biogenesis;metabolic process	membrane;mitochondrion;ribosome	structural molecule activity	Pf01084	55168	Yes	No
Q9NVV4-2	Isoform 2 of Poly(A) RNA polymerase, mitochondrial [OS=Homo sapiens]	78.8	metabolic process	mitochondrion	catalytic activity;metal ion binding;nucleotide binding;protein binding;RNA binding	Pf03828	55149	Yes	No
Q9NW81-4	Isoform 4 of ATP synthase subunit s-like protein [OS=Homo sapiens]	30.2	cell organization and biogenesis				55101	No	Yes	Nucleic Acids Res., 2016, 44, D1251.
Q9NWU5	39S ribosomal protein L22, mitochondrial [OS=Homo sapiens]	23.6	cell organization and biogenesis;metabolic process	membrane;mitochondrion;ribosome	RNA binding;structural molecule activity	Pf00237	29093	Yes	No
Q9NYK5-1	39S ribosomal protein L39, mitochondrial [OS=Homo sapiens]	38.7	cell organization and biogenesis;metabolic process	membrane;mitochondrion;ribosome	nucleotide binding;RNA binding	Pf02824	54148	Yes	No
Q9NYK5-2	Isoform 2 of 39S ribosomal protein L39, mitochondrial [OS=Homo sapiens]	40.4	cell organization and biogenesis;metabolic process	membrane;ribosome	nucleotide binding;RNA binding	Pf02824	54148	No	Yes	Nucleic Acids Res., 2017, 45, D158
Q9NYY8	FAST kinase domain-containing protein 2, mitochondrial [OS=Homo sapiens]	81.4	cell organization and biogenesis;metabolic process	mitochondrion;nucleus	catalytic activity;RNA binding	Pf06743, Pf08368, Pf08373	22868	Yes	No
Q9P032	NADH dehydrogenase [ubiquinone] 1 alpha subcomplex assembly factor 4 [OS=Homo sapiens]	20.3	cell organization and biogenesis	membrane;mitochondrion	protein binding	Pf06784	29078	Yes	No
Q9P0J1-2	Isoform 2 of [Pyruvate dehydrogenase [acetyl-transferring]]-phosphatase 1, mitochondrial [OS=Homo sapiens]	63.7	metabolic process;regulation of biological process	organelle lumen	catalytic activity;metal ion binding;protein binding	Pf00481	54704	No	Yes	Nucleic Acids Res., 2016, 44, D1251.
Q9P258	Protein RCC2 [OS=Homo sapiens]	56	cell division;cell organization and biogenesis;regulation of biological process;response to stimulus	chromosome;cytoplasm;cytoskeleton;cytosol;membrane;nucleus	protein binding;RNA binding	Pf00415, Pf13540	55920	No	No
Q9UHN1	DNA polymerase subunit gamma-2, mitochondrial [OS=Homo sapiens]	54.9	cell organization and biogenesis;metabolic process;response to stimulus	chromosome;mitochondrion;organelle lumen	catalytic activity;DNA binding;protein binding	Pf03129	11232	Yes	No
Q9UJZ1	Stomatin-like protein 2, mitochondrial [OS=Homo sapiens]	38.5	cell organization and biogenesis;cellular homeostasis;metabolic process;regulation of biological process;response to stimulus;transport	cytoplasm;cytoskeleton;membrane;mitochondrion	protein binding	Pf01145	30968	Yes	No
Q9UM73	ALK tyrosine kinase receptor [OS=Homo sapiens]	176.3	cell proliferation;metabolic process;regulation of biological process;response to stimulus	membrane	catalytic activity;nucleotide binding;protein binding;receptor activity;signal transducer activity	Pf00069, Pf00629, Pf07714, Pf14531, Pf14670	238	No	No
Q9UMS0	NFU1 iron-sulfur cluster scaffold homolog, mitochondrial [OS=Homo sapiens]	28.4	cell organization and biogenesis;metabolic process	cytoplasm;cytosol;mitochondrion;nucleus	metal ion binding;protein binding	Pf01106, Pf08712	27247	Yes	No
Q9Y2D0	Carbonic anhydrase 5B, mitochondrial [OS=Homo sapiens]	36.4	metabolic process;transport	mitochondrion;organelle lumen	catalytic activity;metal ion binding	Pf00194	11238	Yes	No
Q9Y2S7	Polymerase delta-interacting protein 2 [OS=Homo sapiens]	42	cell organization and biogenesis;regulation of biological process	mitochondrion;nucleus	DNA binding;protein binding	Pf04379, Pf08755	26073	Yes	No
Q9Y2Z2-6	Isoform 7 of Protein MTO1 homolog, mitochondrial [OS=Homo sapiens]	81.5	cell organization and biogenesis;metabolic process	mitochondrion	nucleotide binding;RNA binding	Pf01134, Pf13932	25821	Yes	No
Q9Y2Z4	Tyrosine--tRNA ligase, mitochondrial [OS=Homo sapiens]	53.2	metabolic process	cytoplasm;cytosol;mitochondrion;organelle lumen	catalytic activity;nucleotide binding;protein binding;RNA binding	Pf00579	51067	Yes	No
Q9Y2Z9-1	Ubiquinone biosynthesis monooxygenase COQ6, mitochondrial [OS=Homo sapiens]	50.8	metabolic process	Golgi;membrane;mitochondrion	catalytic activity;nucleotide binding	Pf01494	51004	Yes	No
Q9Y305-4	Isoform 4 of Acyl-coenzyme A thioesterase 9, mitochondrial [OS=Homo sapiens]	50.8	metabolic process	mitochondrion;organelle lumen	catalytic activity	Pf03061	23597	Yes	No
Q9Y399	28S ribosomal protein S2, mitochondrial [OS=Homo sapiens]	33.2	cell organization and biogenesis;metabolic process	membrane;mitochondrion;ribosome	structural molecule activity	Pf00318	51116	Yes	No
Q9Y3D3	28S ribosomal protein S16, mitochondrial [OS=Homo sapiens]	15.3	cell organization and biogenesis;metabolic process	cytosol;membrane;mitochondrion;ribosome	protein binding;structural molecule activity	Pf00886	51021	Yes	No
Q9Y3D5	28S ribosomal protein S18c, mitochondrial [OS=Homo sapiens]	15.8	cell organization and biogenesis;metabolic process	membrane;mitochondrion;ribosome	structural molecule activity	Pf01084	51023	Yes	No
Q9Y676	28S ribosomal protein S18b, mitochondrial [OS=Homo sapiens]	29.4	cell organization and biogenesis;metabolic process	membrane;mitochondrion;ribosome	protein binding;structural molecule activity	Pf01084	28973	Yes	No
Q9Y6M9	NADH dehydrogenase [ubiquinone] 1 beta subcomplex subunit 9 [OS=Homo sapiens]	21.8	cell organization and biogenesis;metabolic process;transport	membrane;mitochondrion	catalytic activity;protein binding	Pf05347, Pf13232	4715	Yes	No

## Sheet: ERM
Accession	Description	MW [kDa]	Biological Process	Cellular Component	Molecular Function	Pfam IDs	Entrez Gene ID	ER assignement by database	Manual Assign	Secretory Pathway Annotation	Reference for Manual Assign
O43169	Cytochrome b5 type B [OS=Homo sapiens]	16.3	metabolic process;transport	membrane;mitochondrion	metal ion binding;protein binding	Pf00173	80777	No	Yes	Yes	Science, 2017, 356, 6340. Human Protein Atlas available from www.proteinatlas.org
O75840-1	Krueppel-like factor 7 [OS=Homo sapiens]	33.3	cell organization and biogenesis;cellular component movement;metabolic process;regulation of biological process	nucleus	DNA binding;metal ion binding	Pf00096, Pf13465	8609	No	No	No
P00338-3	Isoform 3 of L-lactate dehydrogenase A chain [OS=Homo sapiens]	39.8	metabolic process;regulation of biological process;response to stimulus	cytosol;membrane;nucleus	catalytic activity;nucleotide binding;protein binding	Pf00056, Pf02866	3939	No	No	Yes
P00450	Ceruloplasmin [OS=Homo sapiens]	122.1	cellular homeostasis;metabolic process;transport	extracellular;membrane;organelle lumen	catalytic activity;metal ion binding;protein binding	Pf00394, Pf07731, Pf07732	1356	No	Yes	Yes	Nat. Genet., 2000, 25, 25., Nucleic Acids Res., 2017, 45, D331.
P00747	Plasminogen [OS=Homo sapiens]	90.5	cell differentiation;cell organization and biogenesis;cellular component movement;cellular homeostasis;coagulation;metabolic process;regulation of biological process;transport	cell surface;extracellular;membrane;organelle lumen	catalytic activity;protein binding	Pf00024, Pf00051, Pf00089, Pf09342, Pf13365	5340	No	No	Yes
P02751-15	Isoform 15 of Fibronectin [OS=Homo sapiens]	272.2	cell differentiation;cell organization and biogenesis;cellular component movement;defense response;metabolic process;regulation of biological process;response to stimulus;transport	extracellular;membrane;organelle lumen	enzyme regulator activity;protein binding	Pf00039, Pf00040, Pf00041	2335	No	Yes	Yes	Biochem. Biophys. Res. Commun., 2016, 470, 888.
P04075-2	Isoform 2 of Fructose-bisphosphate aldolase A [OS=Homo sapiens]	45.2	cell organization and biogenesis;cellular homeostasis;metabolic process;regulation of biological process;transport	cytoskeleton;cytosol;extracellular;membrane;nucleus;organelle lumen	catalytic activity;protein binding;RNA binding	Pf00274	226	No	Yes	Yes	J. Biol. Chem., 250, 1975, 5, 1892.
P04150-3	Isoform Alpha-2 of Glucocorticoid receptor [OS=Homo sapiens]	85.8	cell death;cell division;cell organization and biogenesis;metabolic process;regulation of biological process;response to stimulus	cytoplasm;cytosol;nucleus;organelle lumen	DNA binding;metal ion binding;protein binding;receptor activity;RNA binding;signal transducer activity	Pf00104, Pf00105, Pf02155	2908	No	No	Yes
P06702	Protein S100-A9 [OS=Homo sapiens]	13.2	cell communication;cell death;cellular component movement;defense response;metabolic process;regulation of biological process;response to stimulus;transport	cytoplasm;cytoskeleton;cytosol;extracellular;membrane;nucleus;organelle lumen	antioxidant activity;catalytic activity;metal ion binding;protein binding;signal transducer activity	Pf00036, Pf01023, Pf13499, Pf13833	6280	No	No	Yes
P06748	Nucleophosmin [OS=Homo sapiens]	32.6	cell growth;cell organization and biogenesis;cellular homeostasis;metabolic process;regulation of biological process;response to stimulus;transport	cytoplasm;cytoskeleton;cytosol;membrane;nucleus	DNA binding;enzyme regulator activity;protein binding;RNA binding	Pf03066	4869	No	No	Yes
P07195	L-lactate dehydrogenase B chain [OS=Homo sapiens]	36.6	metabolic process	cytoplasm;cytosol;membrane;mitochondrion	catalytic activity;nucleotide binding;protein binding	Pf00056, Pf02866	3945	No	No	Yes
P07900-2	Isoform 2 of Heat shock protein HSP 90-alpha [OS=Homo sapiens]	98.1	cell organization and biogenesis;metabolic process;regulation of biological process;response to stimulus;transport	cytoplasm;cytosol;extracellular;membrane;nucleus;organelle lumen	catalytic activity;enzyme regulator activity;nucleotide binding;protein binding;RNA binding	Pf00183, Pf02518, Pf13589	3320	No	No	Yes
P08670	Vimentin [OS=Homo sapiens]	53.6	cell differentiation;cell organization and biogenesis;cellular component movement;metabolic process;regulation of biological process;response to stimulus	cytoplasm;cytoskeleton;cytosol;membrane	protein binding;RNA binding;structural molecule activity	Pf00038, Pf04111, Pf04156, Pf04732, Pf05622, Pf10186	7431	No	Yes	Yes	Biophys. J., 2013, 105, 1562.
P09651-1	Heterogeneous nuclear ribonucleoprotein A1 [OS=Homo sapiens]	38.7	cell communication;metabolic process;regulation of biological process;response to stimulus;transport	cytoplasm;membrane;nucleus;spliceosomal complex	DNA binding;protein binding;RNA binding	Pf00076, Pf13893, Pf14259	3178	No	Yes	Yes	Histochem. Cell Biol., 2008, 129, 117.
P13639	Elongation factor 2 [OS=Homo sapiens]	95.3	cell differentiation;cell proliferation;metabolic process;regulation of biological process;response to stimulus;transport	cytoplasm;cytosol;extracellular;membrane;nucleus;organelle lumen;ribosome	catalytic activity;nucleotide binding;protein binding;RNA binding	Pf00009, Pf00679, Pf03144, Pf03764, Pf14492	1938	No	No	Yes
P14618	Pyruvate kinase PKM [OS=Homo sapiens]	57.9	cell death;cell organization and biogenesis;metabolic process;response to stimulus;transport	cytoplasm;cytosol;extracellular;mitochondrion;nucleus;organelle lumen	catalytic activity;metal ion binding;nucleotide binding;protein binding;RNA binding	Pf00224, Pf02887	5315	No	Yes	Yes	Cell, 2017, 169, 1051.
P16615	Sarcoplasmic/endoplasmic reticulum calcium ATPase 2 [OS=Homo sapiens]	114.7	cell organization and biogenesis;cellular homeostasis;regulation of biological process;response to stimulus;transport	endoplasmic reticulum;membrane	catalytic activity;metal ion binding;nucleotide binding;protein binding;transporter activity	Pf00122, Pf00689, Pf00690, Pf00702, Pf08282, Pf12710, Pf13246	488	Yes	No	Yes
P19823	Inter-alpha-trypsin inhibitor heavy chain H2 [OS=Homo sapiens]	106.4	metabolic process;regulation of biological process	extracellular;organelle lumen	enzyme regulator activity	Pf00092, Pf06668, Pf08487, Pf13519, Pf13768	3698	No	No	Yes
P20742	Pregnancy zone protein [OS=Homo sapiens]	163.8	regulation of biological process	extracellular	enzyme regulator activity	Pf00207, Pf01835, Pf05326, Pf07677, Pf07678, Pf07703, Pf10569, Pf11974, Pf13249	5858	No	No	Yes
P21333	Filamin-A [OS=Homo sapiens]	280.6	cell organization and biogenesis;cellular component movement;metabolic process;regulation of biological process;response to stimulus;transport	cytoplasm;cytoskeleton;cytosol;extracellular;membrane;nucleus	protein binding;RNA binding;signal transducer activity	Pf00307, Pf00630	2316	No	Yes	Yes	Mol. Biol. Cell, 2011, 22, 1263.
P26641-2	Isoform 2 of Elongation factor 1-gamma [OS=Homo sapiens]	56.1	metabolic process;response to stimulus	cytoplasm;cytosol;endoplasmic reticulum;membrane;nucleus	catalytic activity;protein binding;RNA binding	Pf00043, Pf00647, Pf02798, Pf13409, Pf13410, Pf13417, Pf14497	1937	Yes	No	Yes
P35268	60S ribosomal protein L22 [OS=Homo sapiens]	14.8	cell organization and biogenesis;metabolic process;transport	cytoplasm;cytosol;nucleus;ribosome	protein binding;RNA binding;structural molecule activity	Pf01776	6146	No	No	Yes
P35442	Thrombospondin-2 [OS=Homo sapiens]	129.9	regulation of biological process	extracellular	metal ion binding;protein binding	Pf00090, Pf00093, Pf02412, Pf05735, Pf12947	7058	No	No	Yes
P36578	60S ribosomal protein L4 [OS=Homo sapiens]	47.7	cell organization and biogenesis;metabolic process;transport	cytoplasm;cytosol;endoplasmic reticulum;membrane;nucleus;ribosome	protein binding;RNA binding;structural molecule activity	Pf00573, Pf14374	6124	Yes	No	Yes
P62826	GTP-binding nuclear protein RAN [OS=Homo sapiens]	24.4	cell division;cell organization and biogenesis;metabolic process;regulation of biological process;response to stimulus;transport	chromosome;cytoplasm;cytosol;endosome;membrane;nucleus	catalytic activity;metal ion binding;nucleotide binding;protein binding;RNA binding;transporter activity	Pf00025, Pf00071, Pf08477	5901	No	No	Yes
P63244	Receptor of activated protein C kinase 1 [OS=Homo sapiens]	35.1	cell death;cellular homeostasis;development;metabolic process;regulation of biological process;response to stimulus	cytoplasm;cytosol;membrane;mitochondrion;nucleus;ribosome	enzyme regulator activity;protein binding;RNA binding;structural molecule activity	Pf00400	10399	No	Yes	Yes	Nat. Cell Biol. 2008, 10, 1324., Sci. Signal., 2010, 26, ra7.
P68363	Tubulin alpha-1B chain [OS=Homo sapiens]	50.1	cell division;cell organization and biogenesis;response to stimulus;transport	cytoplasm;cytoskeleton;membrane	catalytic activity;nucleotide binding;protein binding;RNA binding;structural molecule activity	Pf00091, Pf03953	10376	No	No	Yes
P68371	Tubulin beta-4B chain [OS=Homo sapiens]	49.8	cell organization and biogenesis;cellular component movement;defense response;regulation of biological process;response to stimulus;transport	cytoplasm;cytoskeleton;cytosol;extracellular;nucleus;organelle lumen	catalytic activity;nucleotide binding;protein binding;RNA binding;structural molecule activity	Pf00091, Pf03953, Pf10644	10383	No	No	Yes
Q5RHP9	glutamate-rich protein 3 [OS=Homo sapiens]	168.4				Pf15257	127254	No	No	No
Q93084-5	Isoform SERCA3E of Sarcoplasmic/endoplasmic reticulum calcium ATPase 3 [OS=Homo sapiens]	114.9	transport	endoplasmic reticulum;membrane	catalytic activity;metal ion binding;nucleotide binding;transporter activity	Pf00122, Pf00689, Pf00690, Pf00702, Pf08282, Pf12710, Pf13246	489	Yes	No	Yes
Q96Q89-2	Isoform 2 of Kinesin-like protein KIF20B [OS=Homo sapiens]	214.1	cell division;cell organization and biogenesis;cellular component movement;regulation of biological process	cytoplasm;cytosol;nucleus	catalytic activity;motor activity;nucleotide binding;protein binding	Pf00225, Pf01576, Pf02463, Pf03961, Pf07851, Pf09726	9585	No	No	No
Q99714-1	3-hydroxyacyl-CoA dehydrogenase type-2 [OS=Homo sapiens]	26.9	cell organization and biogenesis;metabolic process	cytoplasm;membrane;mitochondrion;organelle lumen	catalytic activity;protein binding;RNA binding	Pf00106, Pf08659, Pf13561	3028	No	Yes	Yes	Nature, 1997, 389, 689.
Q9BQB6-1	vitamin K epoxide reductase complex subunit 1 [OS=Homo sapiens]	18.2	coagulation;metabolic process	endoplasmic reticulum;membrane	catalytic activity	Pf07884	79001	Yes	No	Yes
Q9BUF5	Tubulin beta-6 chain [OS=Homo sapiens]	49.8	cell organization and biogenesis	cytoplasm;cytoskeleton;nucleus	catalytic activity;nucleotide binding;structural molecule activity	Pf00091, Pf03953, Pf10644	84617	No	No	Yes
Q9HCJ0-2	Isoform 2 of Trinucleotide repeat-containing gene 6C protein [OS=Homo sapiens]	179.2	regulation of biological process;response to stimulus	cytosol	protein binding;RNA binding	Pf00076, Pf00627, Pf10427, Pf12938, Pf13893, Pf14259	57690	No	No	No
Q9Y6C9	Mitochondrial carrier homolog 2 [OS=Homo sapiens]	33.3	regulation of biological process;transport	membrane;mitochondrion;nucleus		Pf00153	23788	No	No	Yes
